# Supplementary material for: Base free regioselective synthesis of α-triazolylazine derivatives
Source: Royal Society of Chemistry journal article supplement (doi:10.1039/c6ra10452e), 2016-01-01
Supplement: c6ra10452e1.pdf [file c6ra10452e1.pdf]

## Base free regioselective synthesis of $\alpha$ -triazolylazine derivatives

Mysore Bhyrappa Harisha,<sup>a,b</sup> Muthupandi Nagaraj,<sup>a</sup> Shanmugam Muthusubramanian\*<sup>a</sup> and Nattamai Bhuvanesh<sup>c</sup>

<sup>a</sup> Department of Organic Chemistry, School of Chemistry, Madurai Kamaraj University, Madurai - 625 021, Tamil Nadu, India

<sup>b</sup> Advinus Therapeutics Limited, A TATA Enterprise, Bangalore - 560 058, India

<sup>c</sup> X-ray Diffraction Laboratory, Department of Chemistry, Texas A & M University, College Station, TX 77842, USA

[muthumanian2001@yahoo.com](mailto:muthumanian2001@yahoo.com)

| No | Table of contents                                                                                | Page |
|----|--------------------------------------------------------------------------------------------------|------|
| 1  | <sup>1</sup> H NMR and <sup>13</sup> C NMR spectra of compound 4a (DMSO- <i>d</i> <sub>6</sub> ) | 3    |
| 2  | <sup>1</sup> H NMR and <sup>13</sup> C NMR spectra of compound 4a (CDCl <sub>3</sub> )           | 4    |
| 3  | <sup>1</sup> H NMR and <sup>13</sup> C NMR spectra of compound 4b                                | 5    |
| 4  | <sup>1</sup> H NMR and <sup>13</sup> C NMR spectra of compound 4c                                | 6    |
| 5  | DEPT-135 and H,H -COSY spectrum of compound 4c                                                   | 7    |
| 6  | C,H-COSY and HMBC Spectrum of compound 4c                                                        | 8    |
| 7  | HMBC (expanded) and NOESY spectrum of compound 4c                                                | 9    |
| 8  | Mass spectra of compound 4c                                                                      | 10   |
| 9  | <sup>1</sup> H NMR and <sup>13</sup> C NMR spectra of compound 4d                                | 11   |
| 10 | <sup>1</sup> H NMR and <sup>13</sup> C NMR spectra of compound 4e                                | 12   |
| 11 | <sup>1</sup> H NMR and <sup>13</sup> C NMR spectra of compound 4f                                | 13   |
| 12 | <sup>1</sup> H NMR and <sup>13</sup> C NMR spectra of compound 4g                                | 14   |
| 13 | <sup>1</sup> H NMR and <sup>13</sup> C NMR spectra of compound 4h                                | 15   |
| 14 | <sup>1</sup> H NMR and <sup>13</sup> C NMR spectra of compound 4i                                | 16   |
| 15 | <sup>1</sup> H NMR and <sup>13</sup> C NMR spectra of compound 4j                                | 17   |

|    |                                                                                               |    |
|----|-----------------------------------------------------------------------------------------------|----|
| 16 | <b><math>^1\text{H}</math> NMR and <math>^{13}\text{C}</math> NMR spectra of compound 4ja</b> | 18 |
| 17 | <b><math>^1\text{H}</math> NMR and <math>^{13}\text{C}</math> NMR spectra of compound 4k</b>  | 19 |
| 18 | <b><math>^1\text{H}</math> NMR and <math>^{13}\text{C}</math> NMR spectra of compound 4l</b>  | 20 |
| 19 | <b><math>^1\text{H}</math> NMR and <math>^{13}\text{C}</math> NMR spectra of compound 4m</b>  | 21 |
| 20 | <b><math>^1\text{H}</math> NMR and <math>^{13}\text{C}</math> NMR spectra of compound 4n</b>  | 22 |
| 21 | <b><math>^1\text{H}</math> NMR and <math>^{13}\text{C}</math> NMR spectra of compound 4o</b>  | 23 |
| 22 | <b><math>^1\text{H}</math> NMR and <math>^{13}\text{C}</math> NMR spectra of compound 4p</b>  | 24 |
| 23 | <b><math>^1\text{H}</math> NMR and <math>^{13}\text{C}</math> NMR spectra of compound 4q</b>  | 25 |
| 24 | <b><math>^1\text{H}</math> NMR and <math>^{13}\text{C}</math> NMR spectra of compound 4r</b>  | 26 |

---

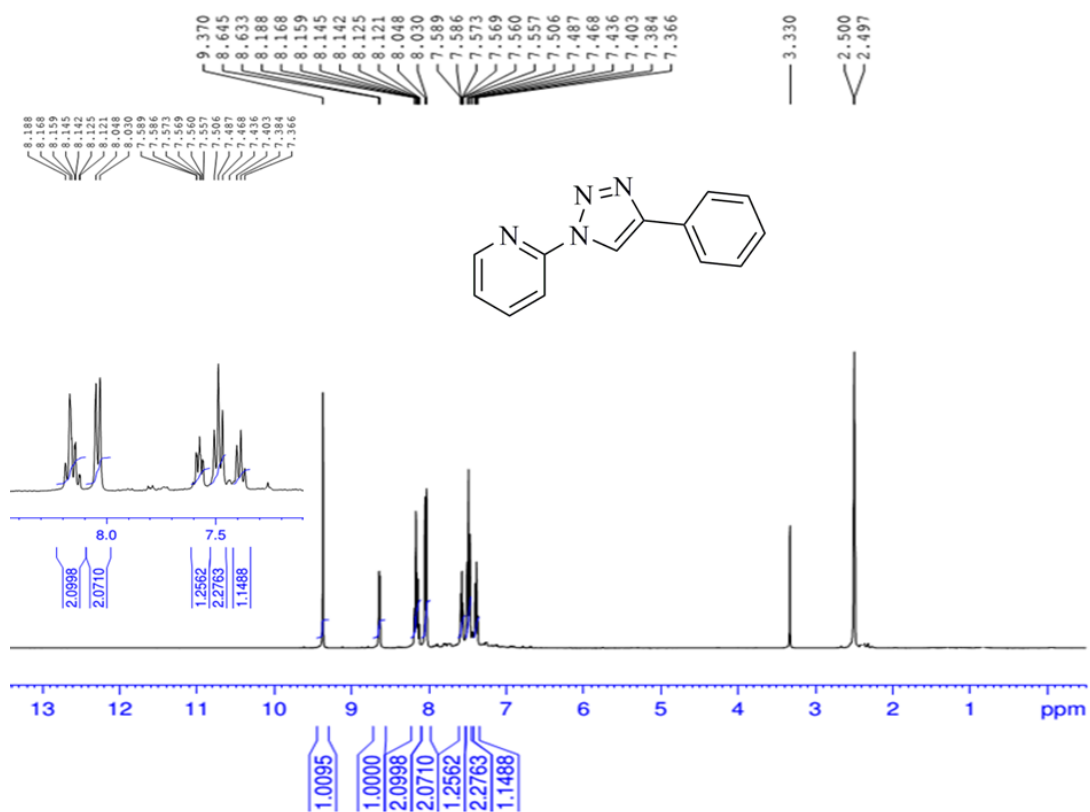

**Figure 1.** <sup>1</sup>H NMR spectrum of 4a

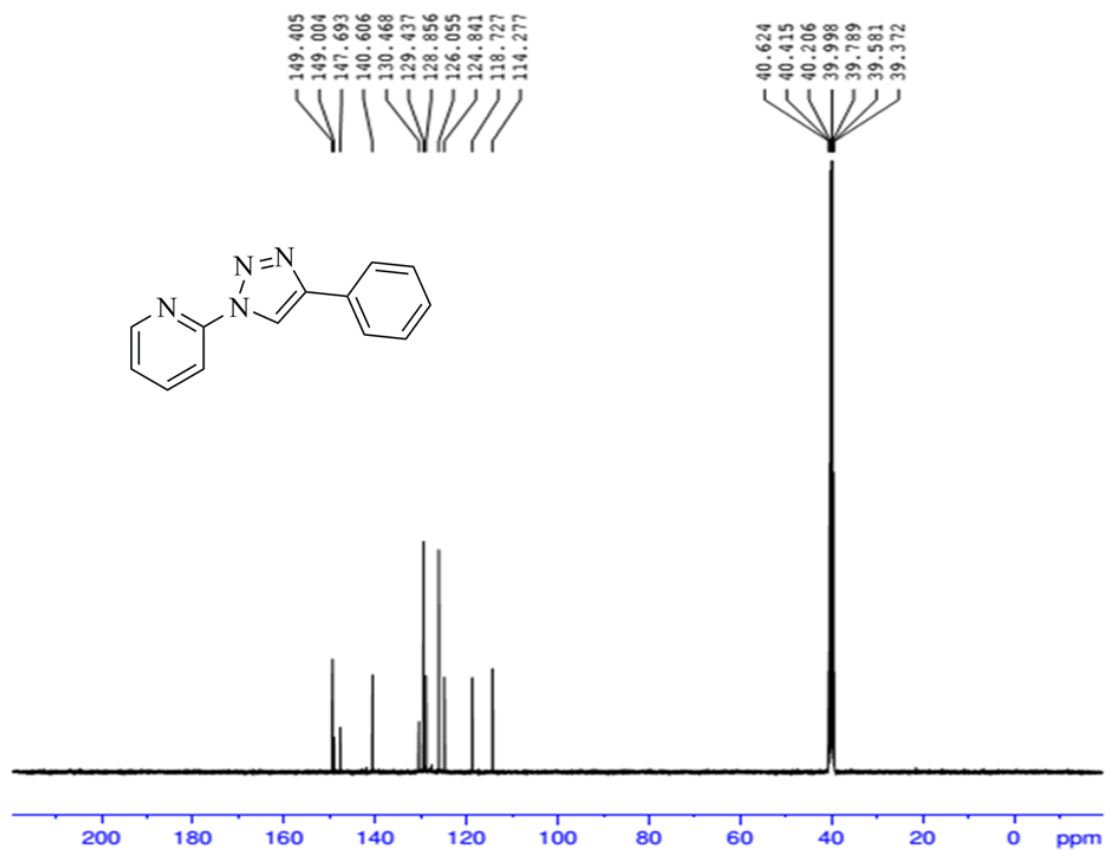

**Figure 2.** <sup>13</sup>C NMR spectrum of 4a



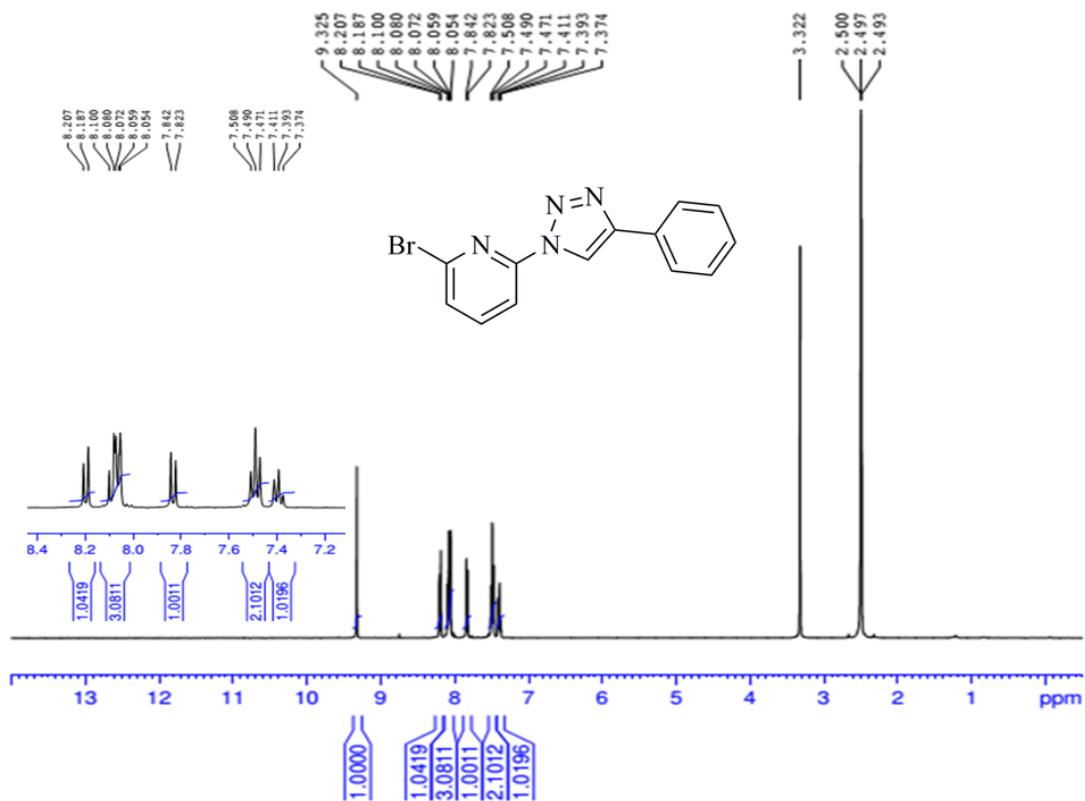

**Figure 5.** <sup>1</sup>H NMR spectrum of **4b**

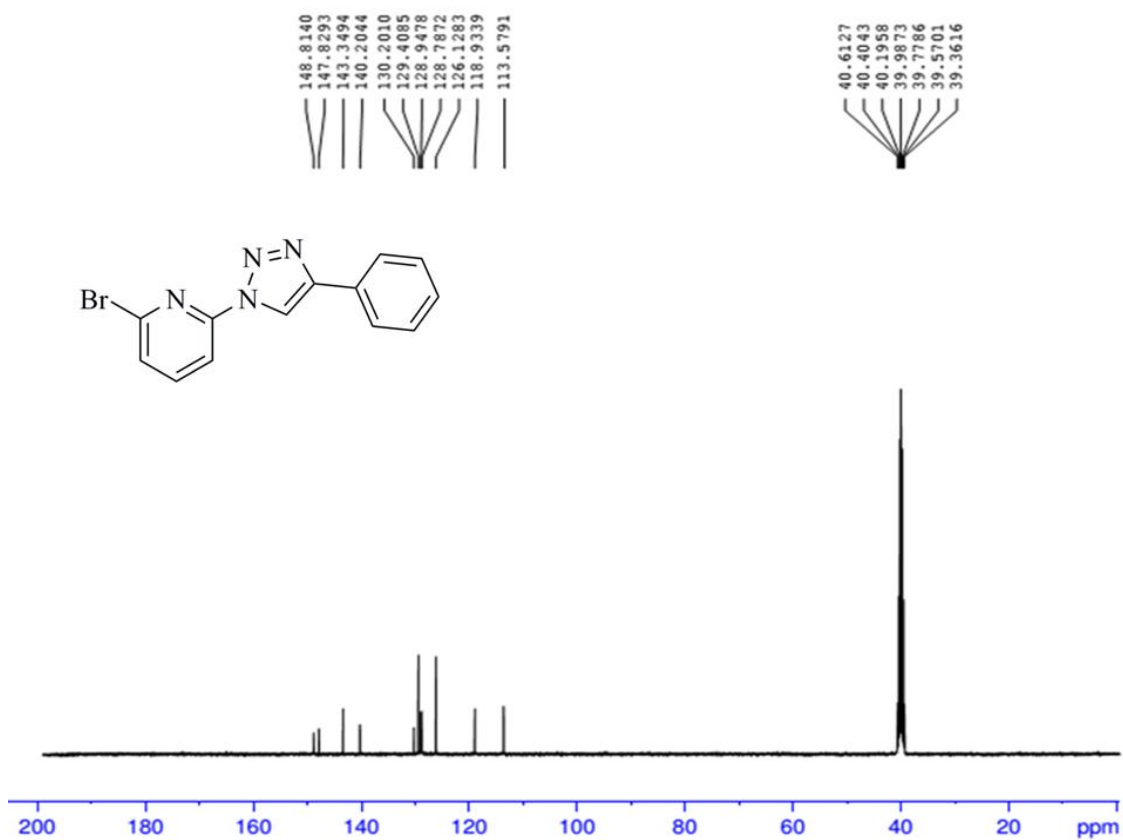

**Figure 6.** <sup>13</sup>C NMR spectrum of **4b**

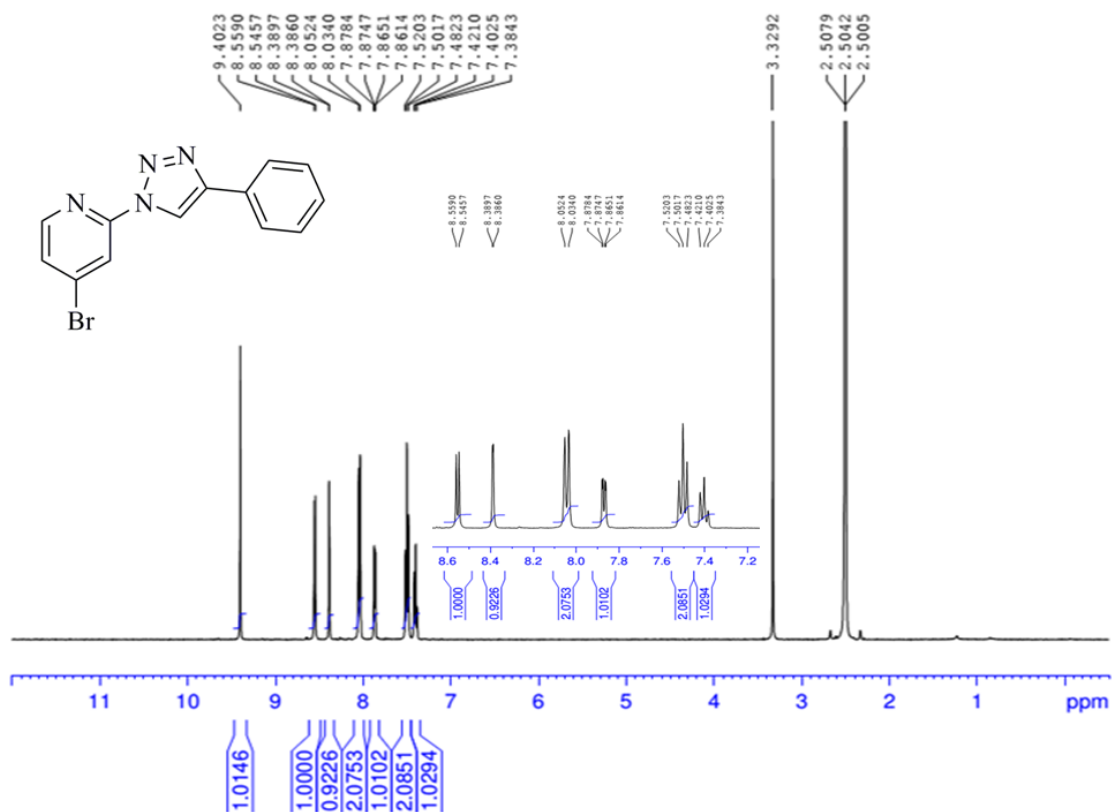

**Figure 7.** <sup>1</sup>H NMR spectrum of **4c**

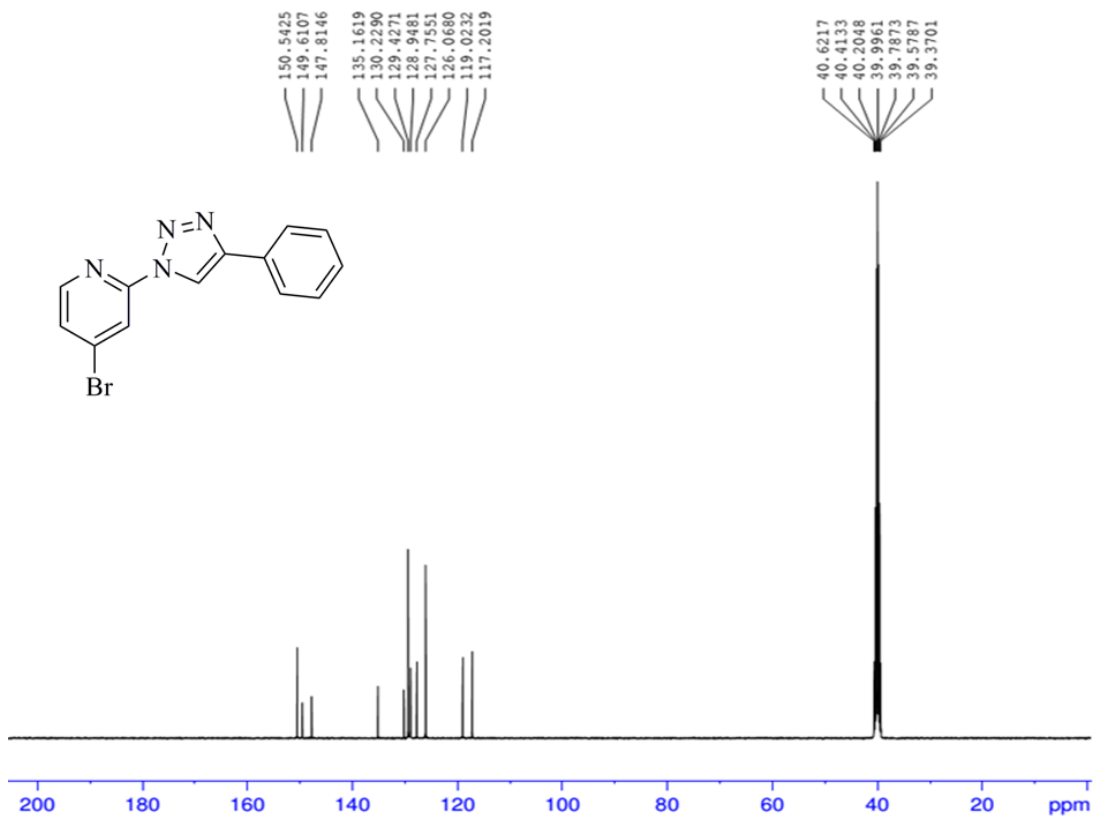

**Figure 8.** <sup>13</sup>C NMR spectrum of **4c**

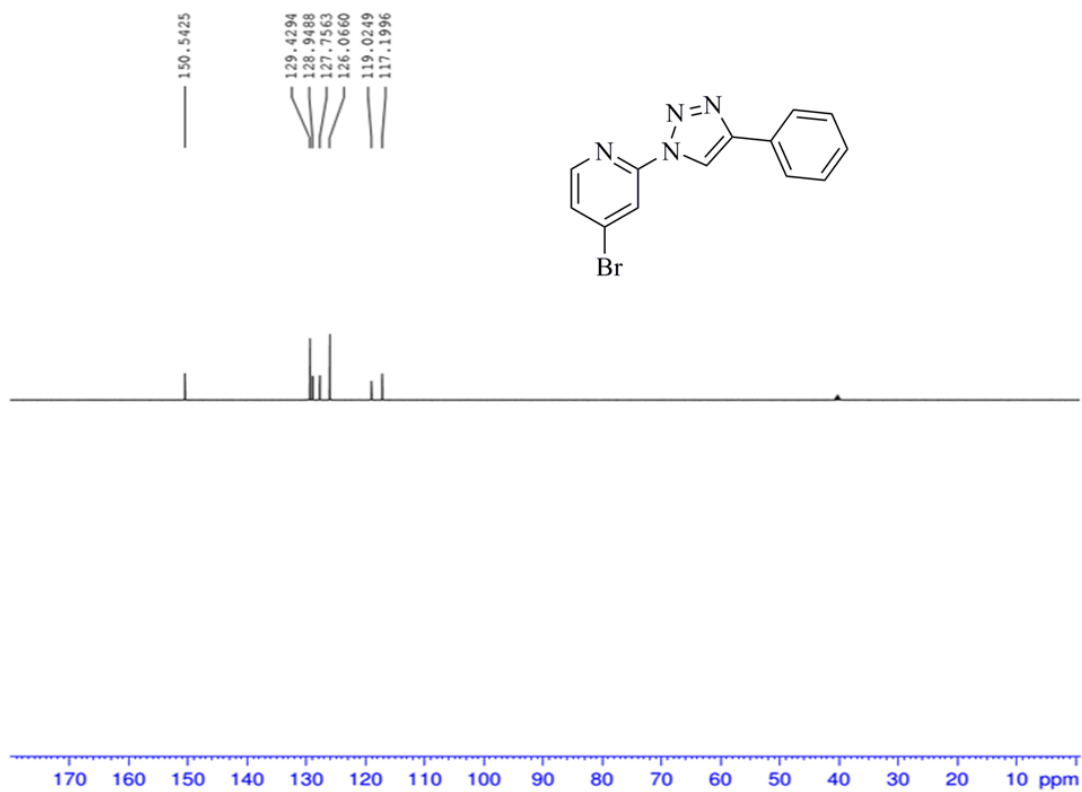

**Figure 9.** DEPT 135 spectrum of **4c**

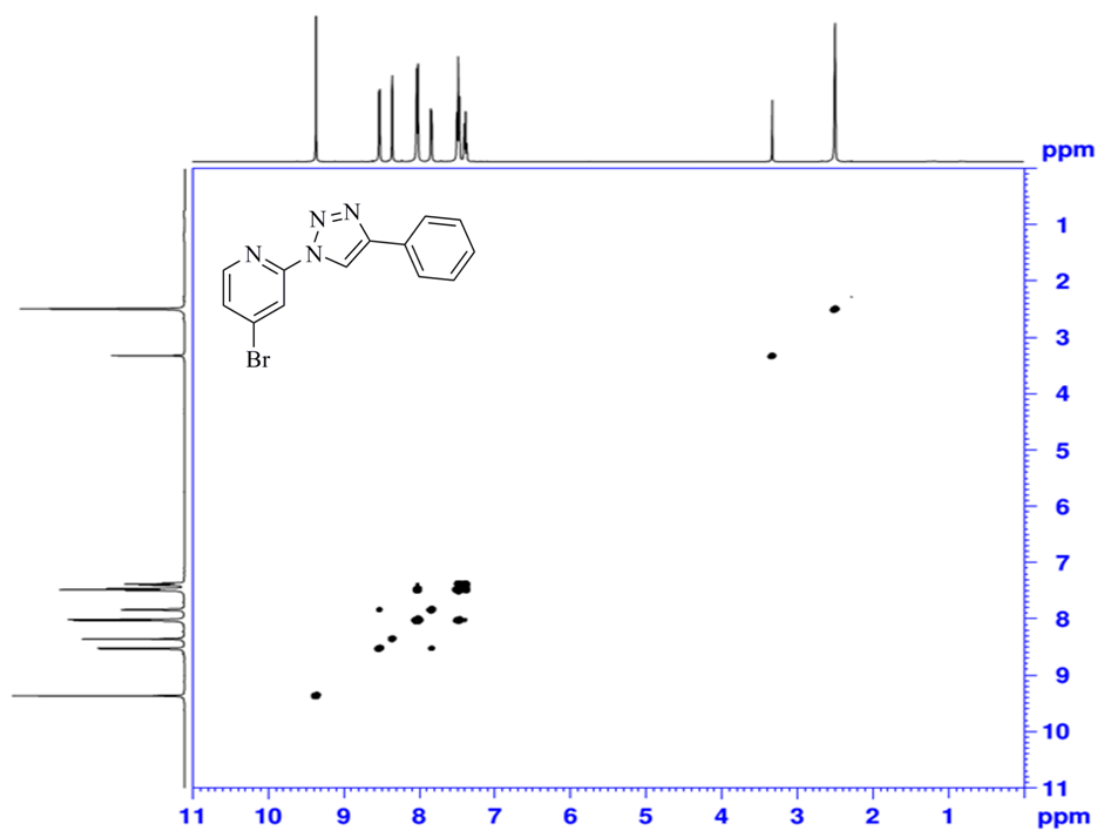

**Figure 10.** H,H- COSY spectrum of **4c**

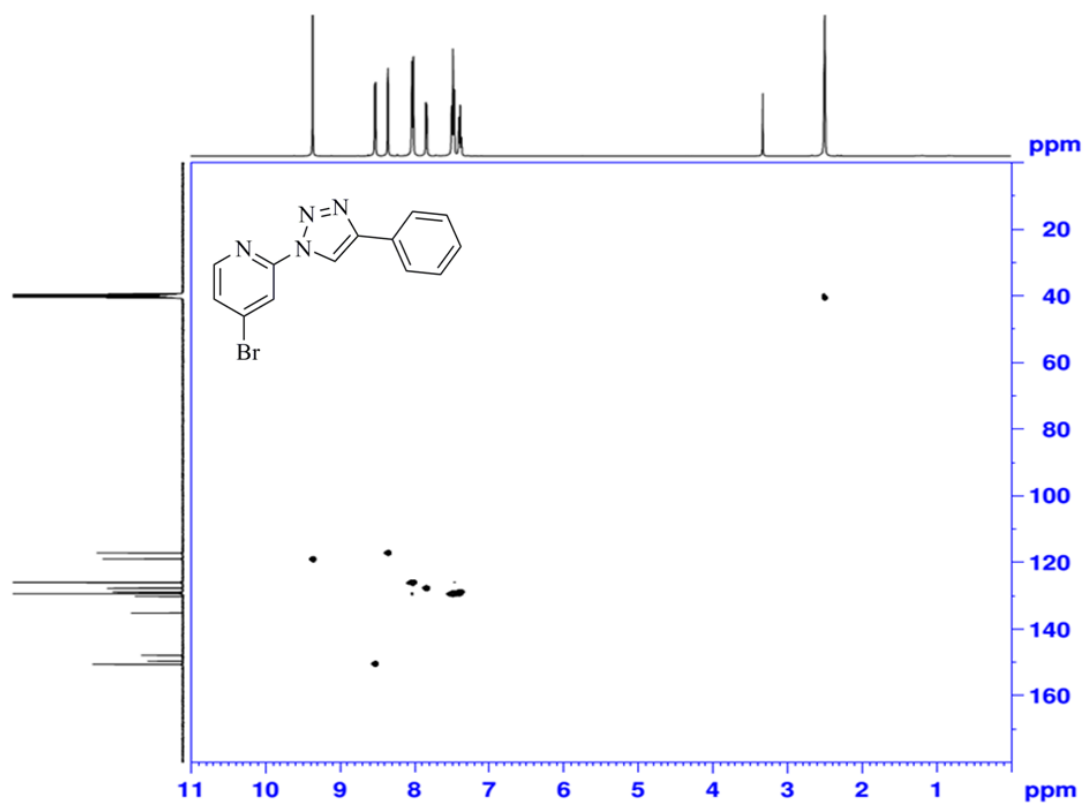

Figure 11. C,H- COSY spectrum of **4c**

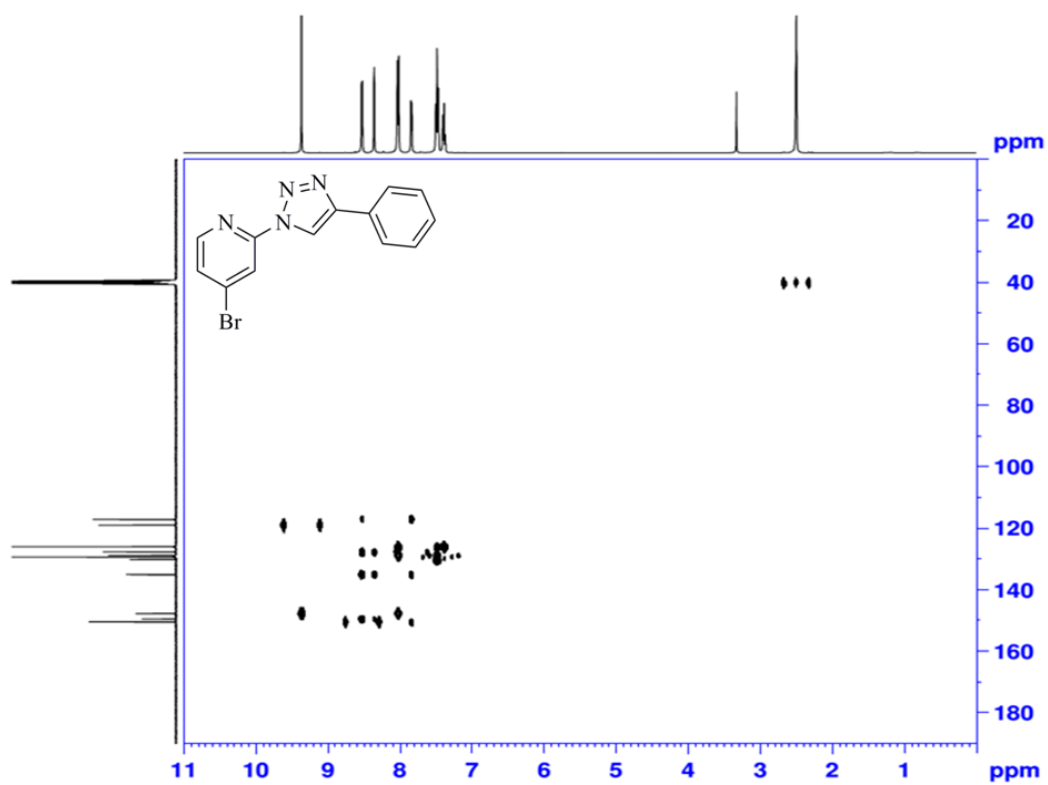

Figure 12. HMBC spectrum of **4c**



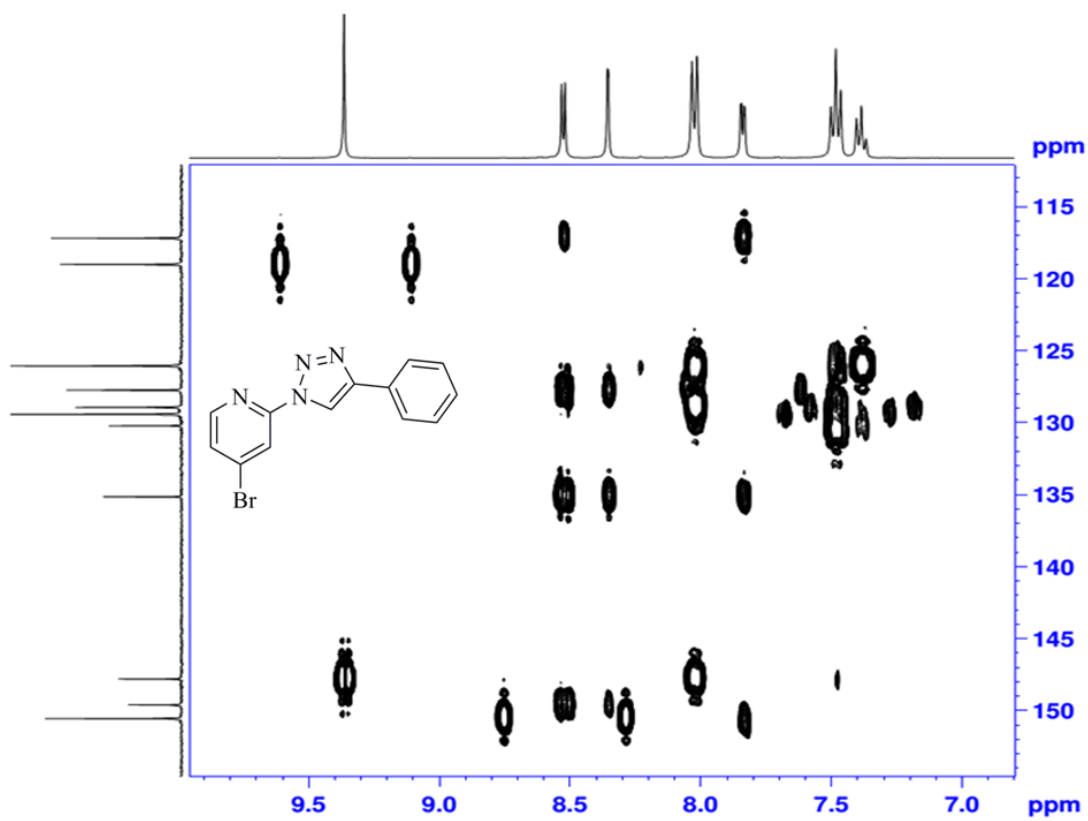

Figure 13. HMBC (expanded) spectrum of 4c

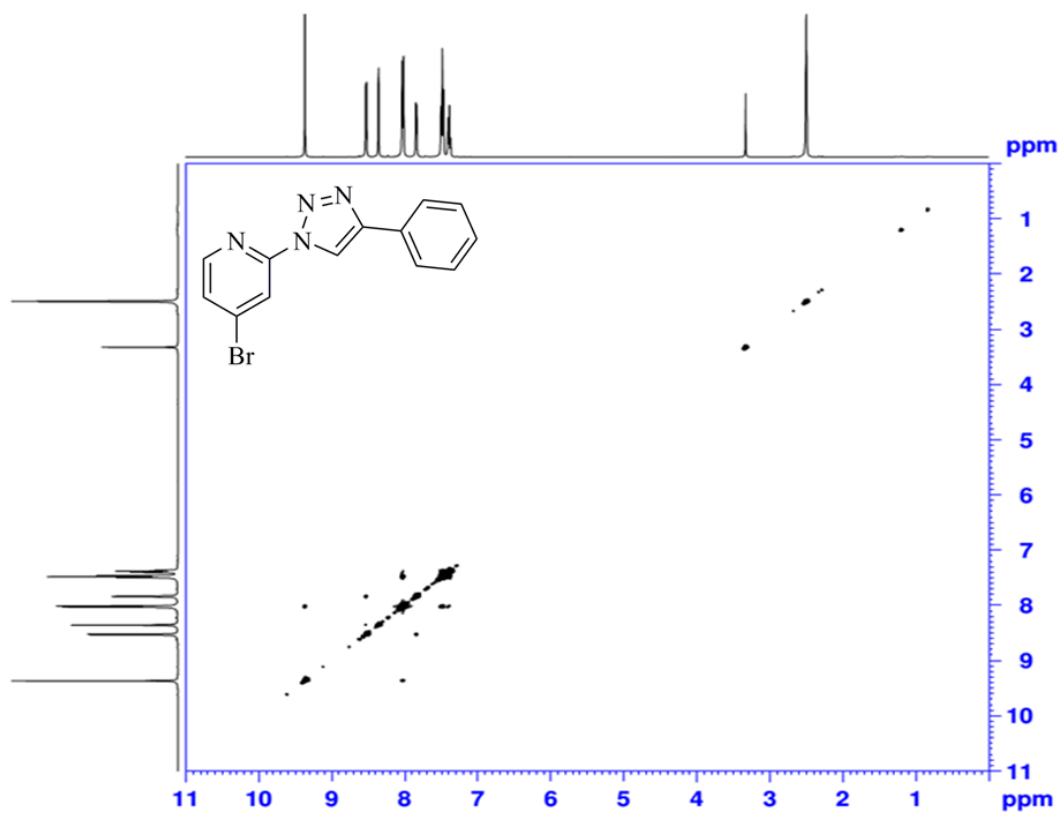

Figure 14. NOESY spectrum of 4c

```

Injection Date : 10/16/2014      Seq Line      :8.00
Sample Name    : 4-Br-PY          Location     :Vial 24
Acq Operator   :                  Injection Volume :10.00 ul
Injection time : 1:12:24 PM
Acq.Method    : D:\data\Oct-2014\161014 2014-10-16

Data file     : D:\DATA\OCT-2014\161014 2014-10-16
  
```

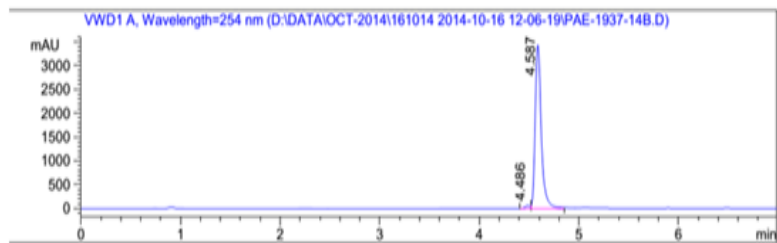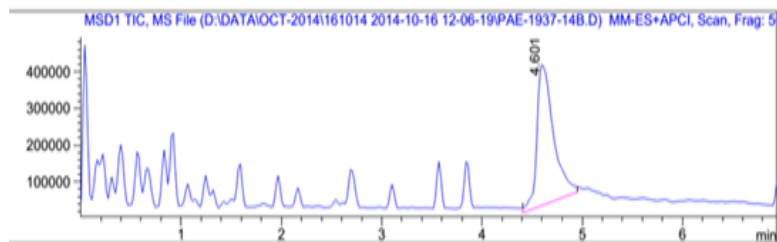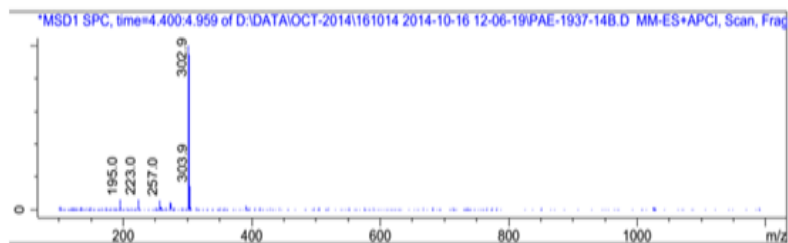

VWD1 A, Wavelength=254 nm

| Peak # | Compound Name | Meas. Ret. T Min | Area    | Area % |
|--------|---------------|------------------|---------|--------|
| 1      |               | 4.49             | 219.3   | 1.48   |
| 2      |               | 4.59             | 14644.3 | 98.52  |

MSD1 TIC, MS File

| Peak # | Compound Name | Meas. Ret. T Min | Area      | Area % |
|--------|---------------|------------------|-----------|--------|
| 1      |               | 4.60             | 4414863.5 | 100.00 |

Figure 15. Mass spectrum of 4c

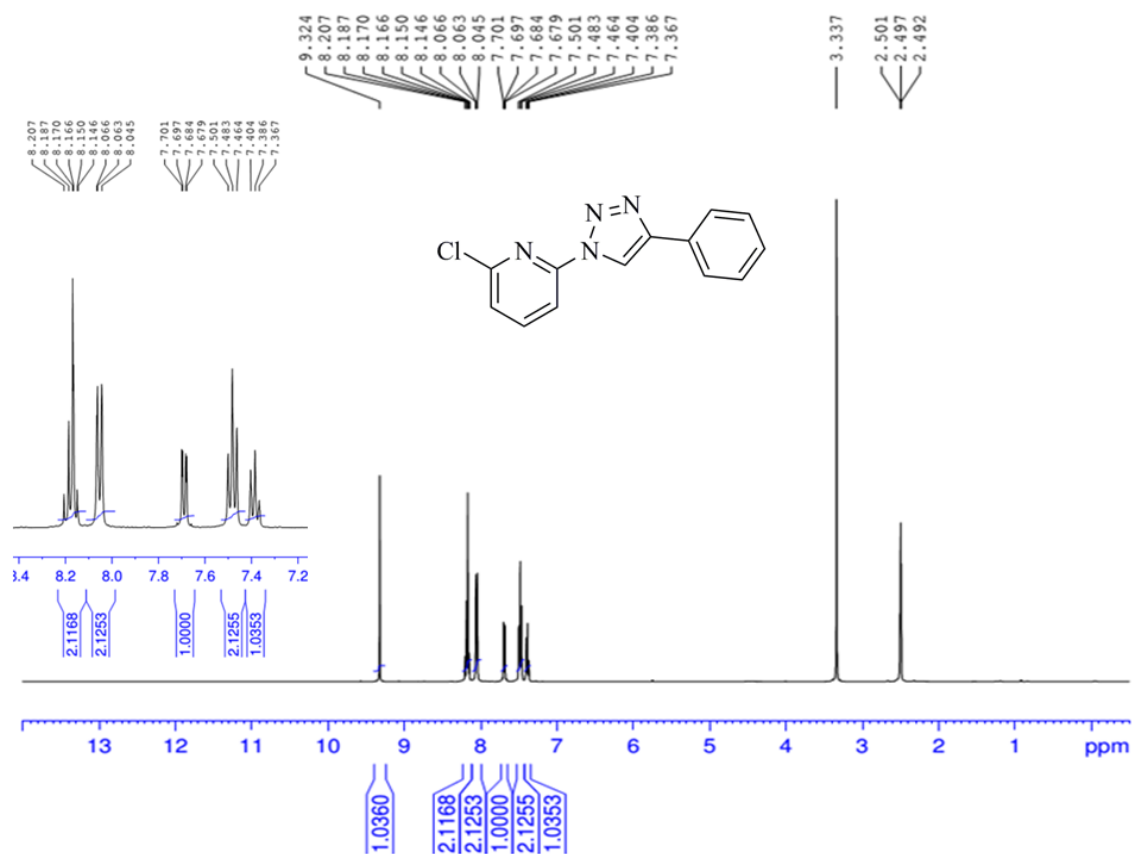

**Figure 16.** <sup>1</sup>H NMR spectrum of **4d**

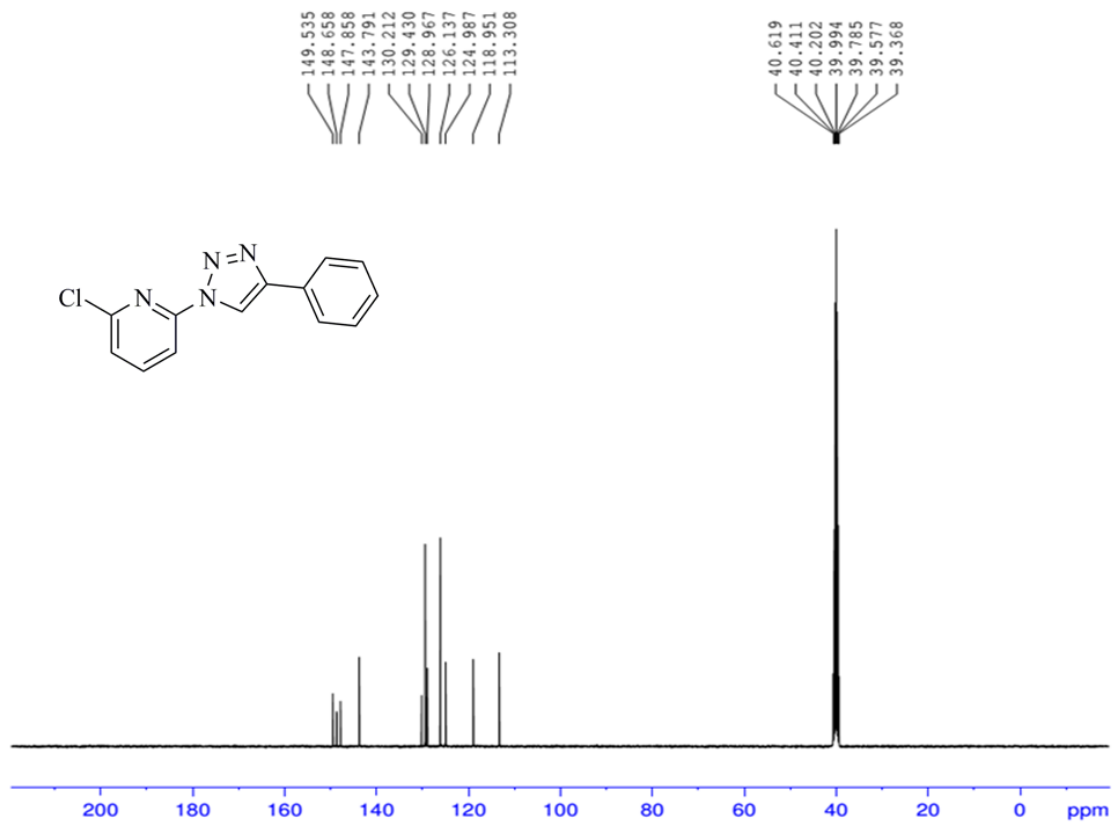

**Figure 17.** <sup>13</sup>C NMR spectrum of **4d**

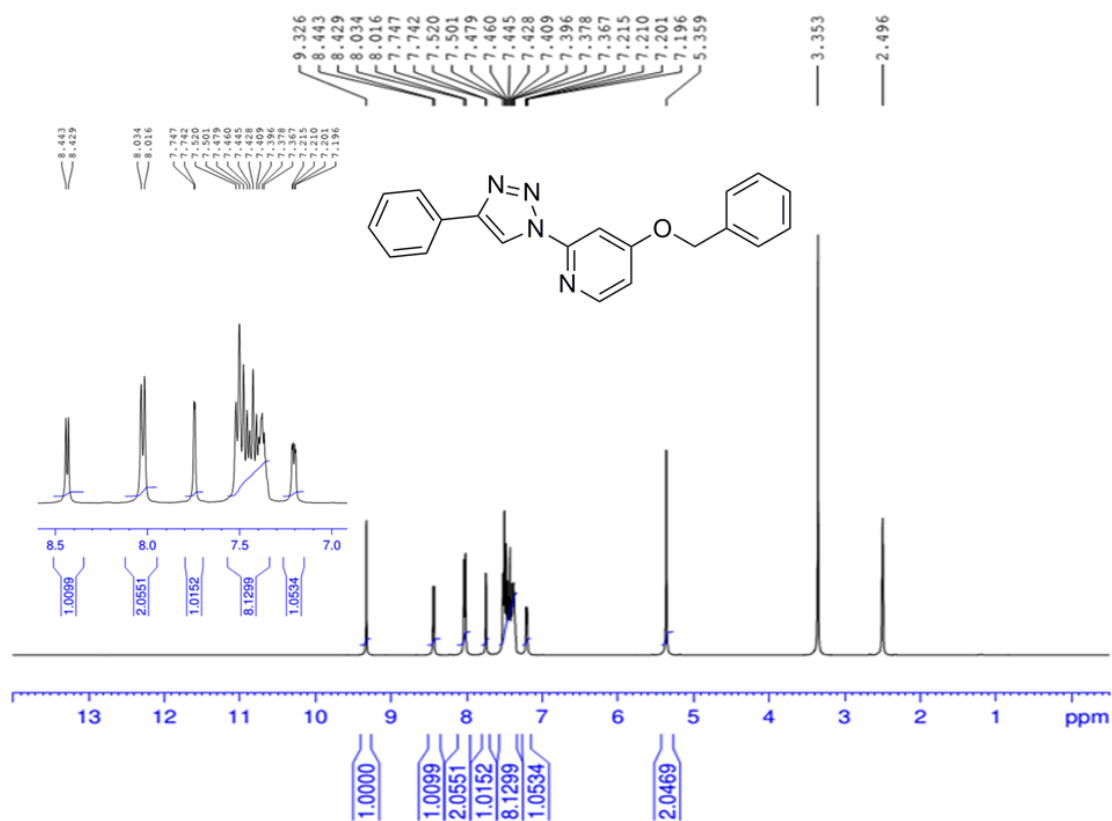

Figure 18. <sup>1</sup>H NMR spectrum of 4e

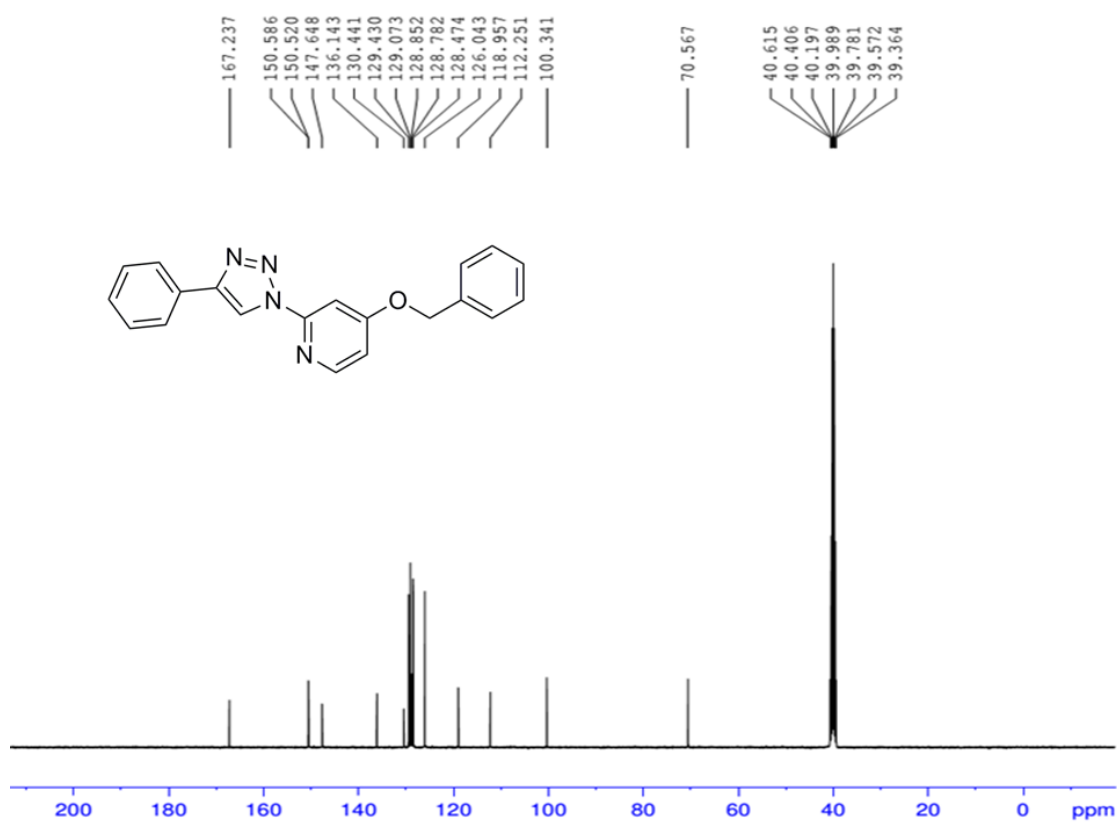

Figure 19. <sup>13</sup>C NMR spectrum of 4e

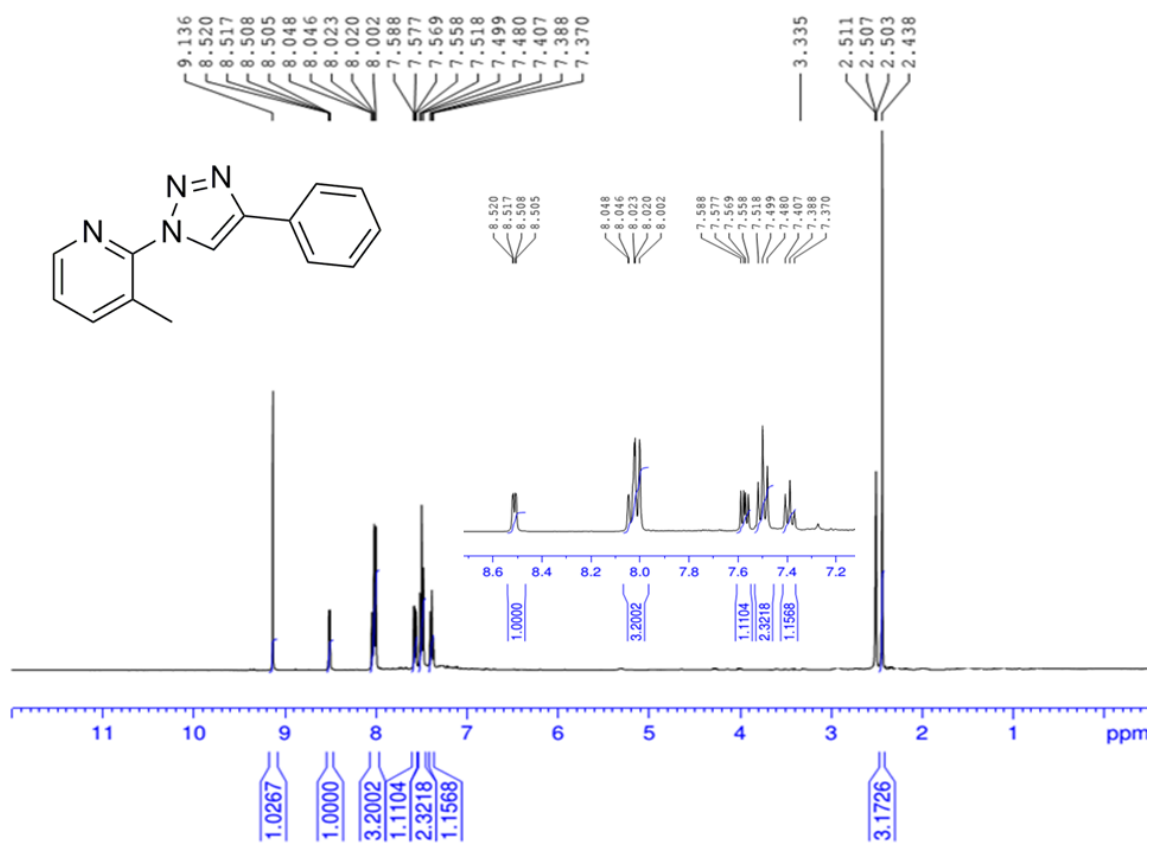

Figure 20. <sup>1</sup>H NMR spectrum of 4f

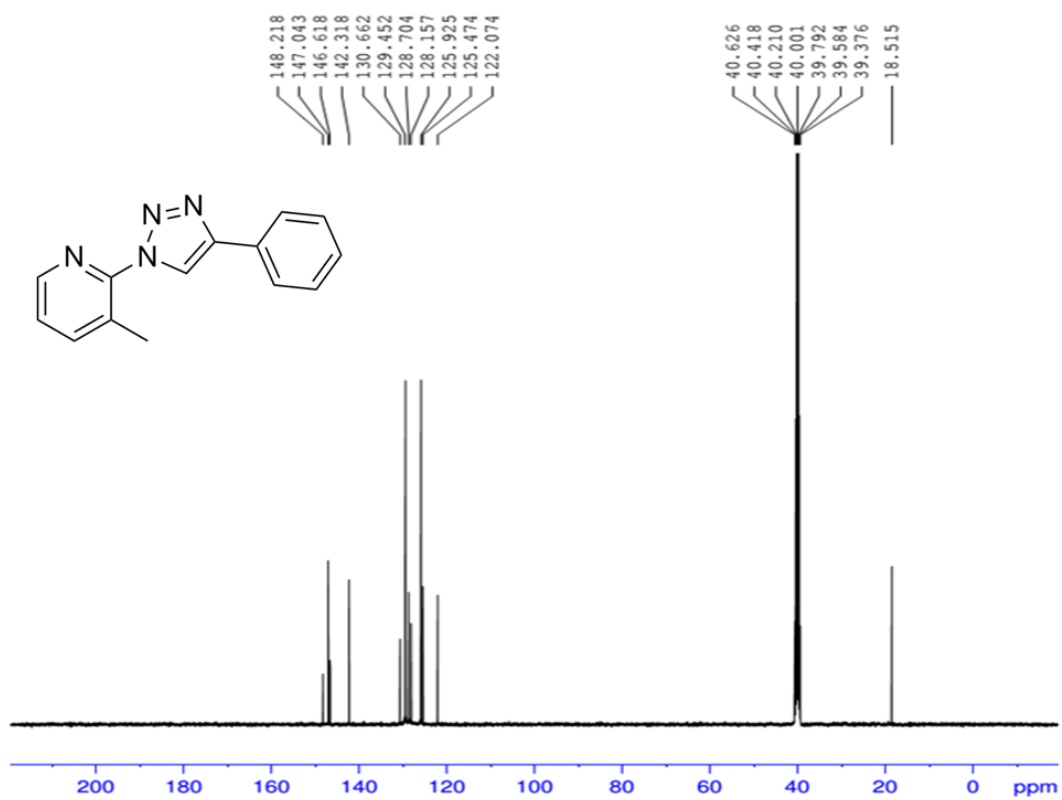

Figure 21. <sup>13</sup>C NMR spectrum of 4f

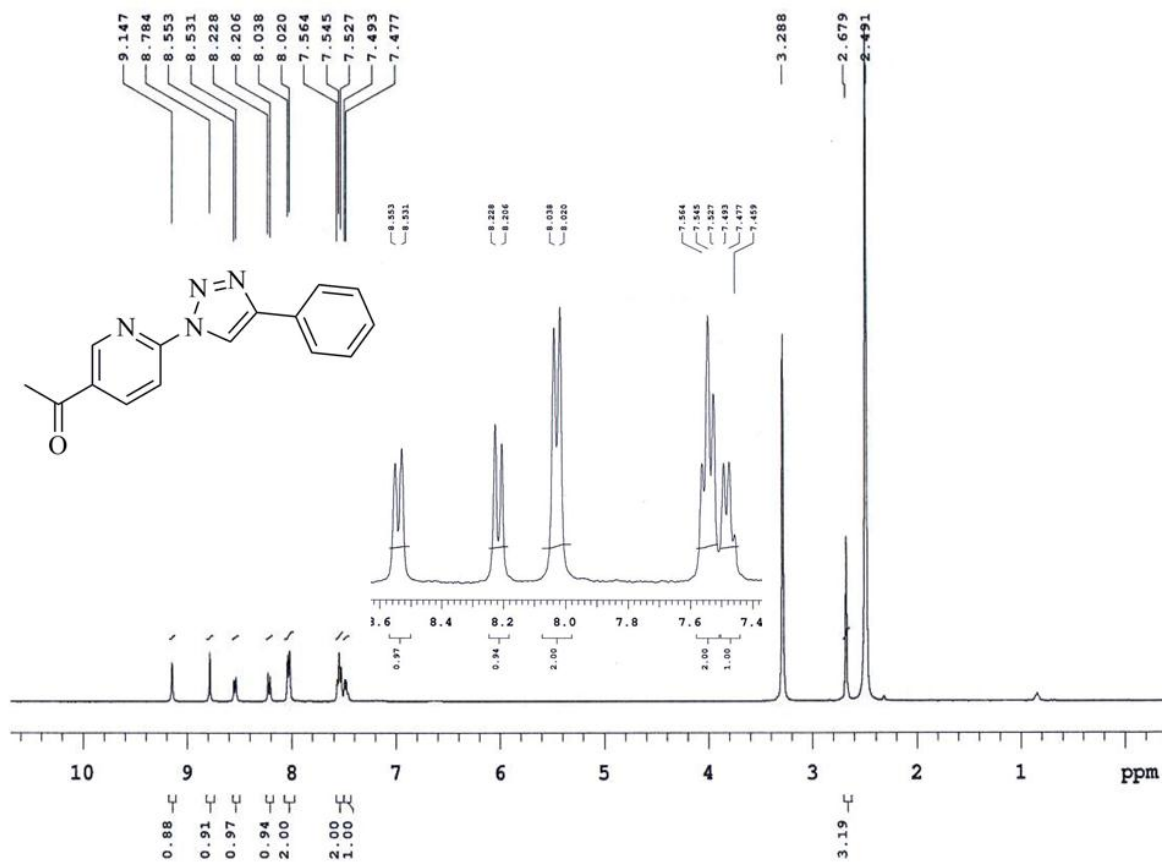

**Figure 22.**  $^1\text{H}$  NMR spectrum of **4g**

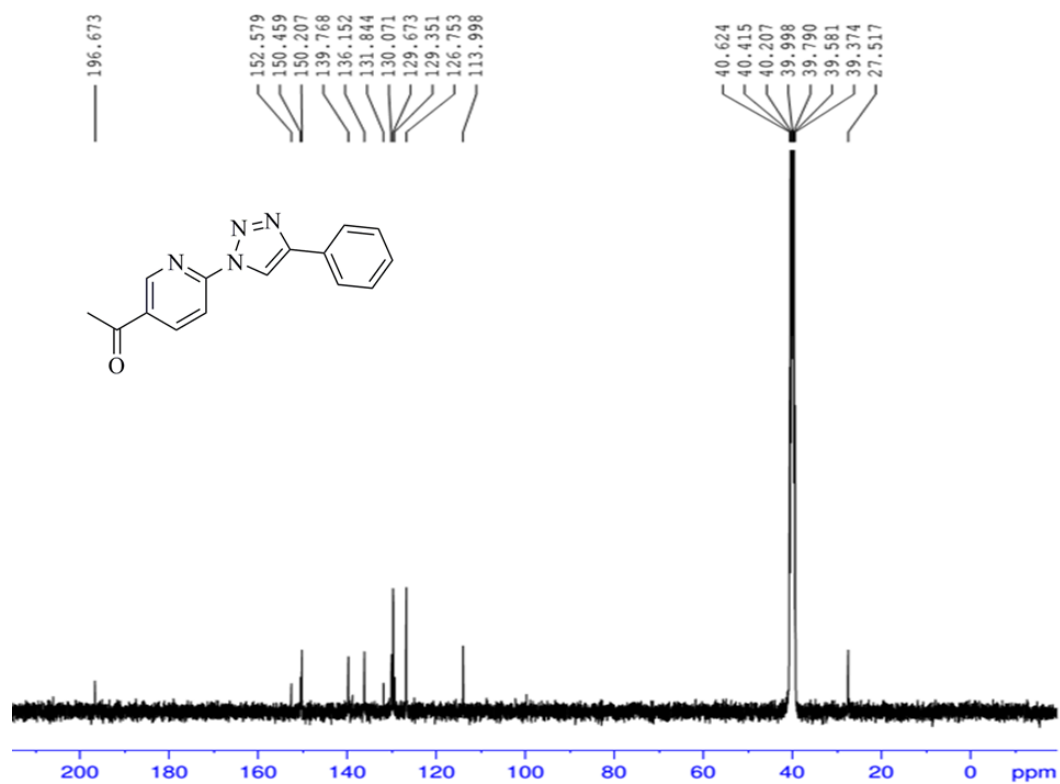

**Figure 23.**  $^{13}\text{C}$  NMR spectrum of **4g**

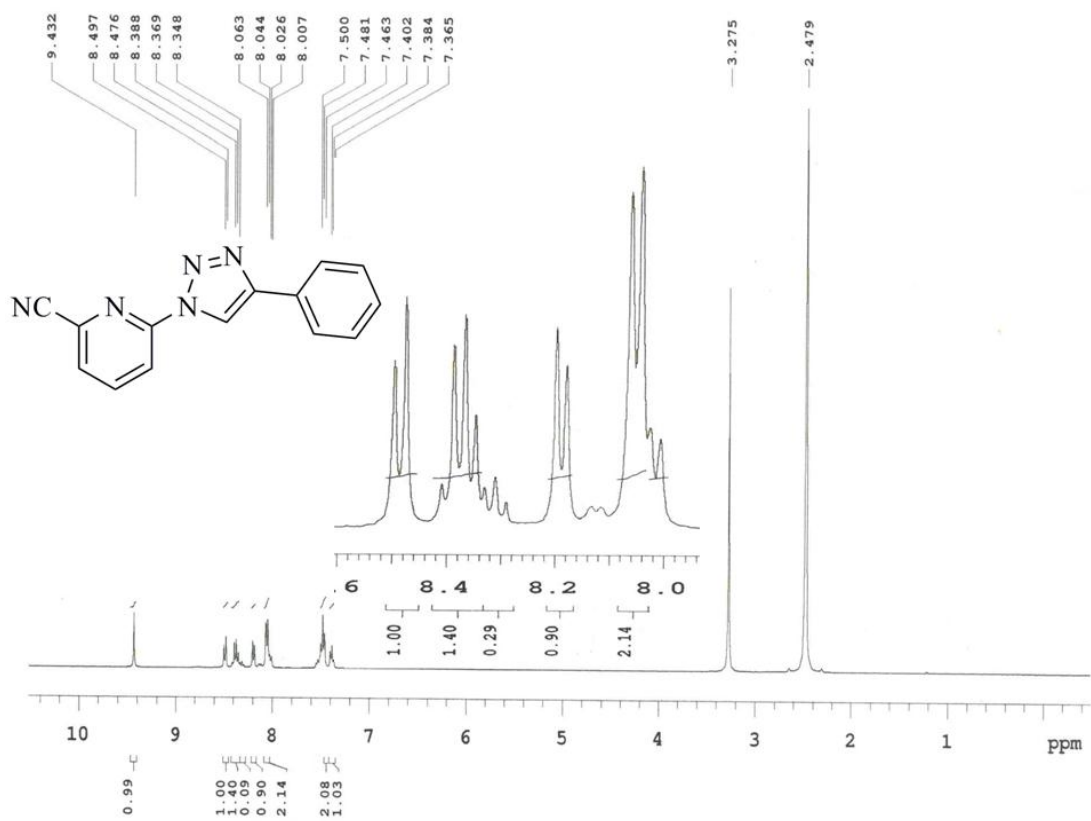

Figure 24. <sup>1</sup>H NMR spectrum of **4h**

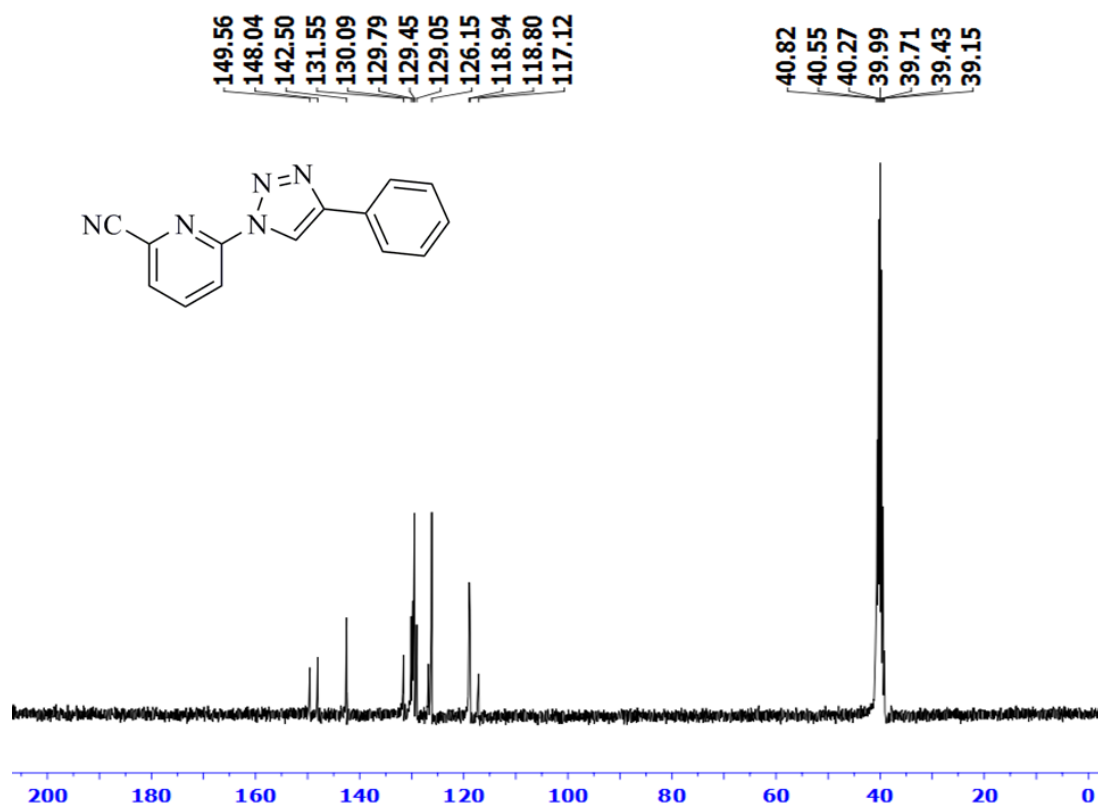

Figure 25. <sup>13</sup>C NMR spectrum of **4h**

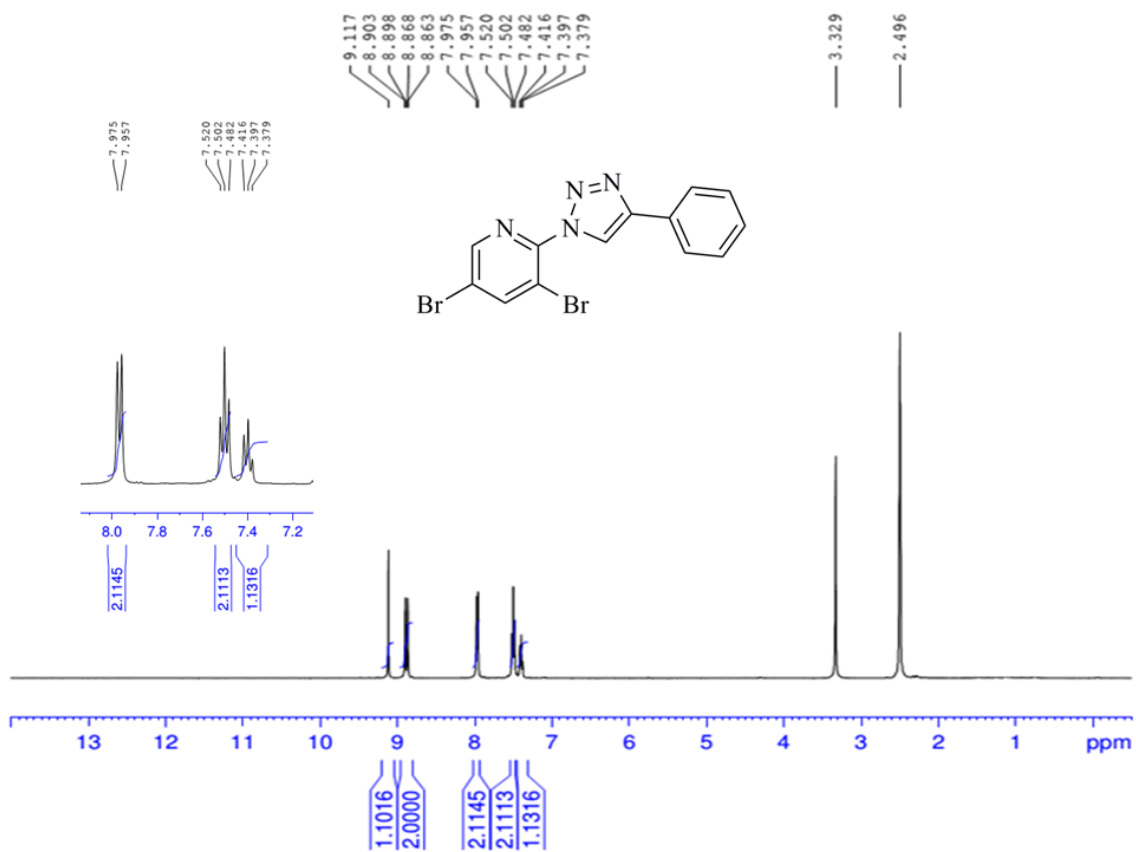

**Figure 26.** <sup>1</sup>H NMR spectrum of **4i**

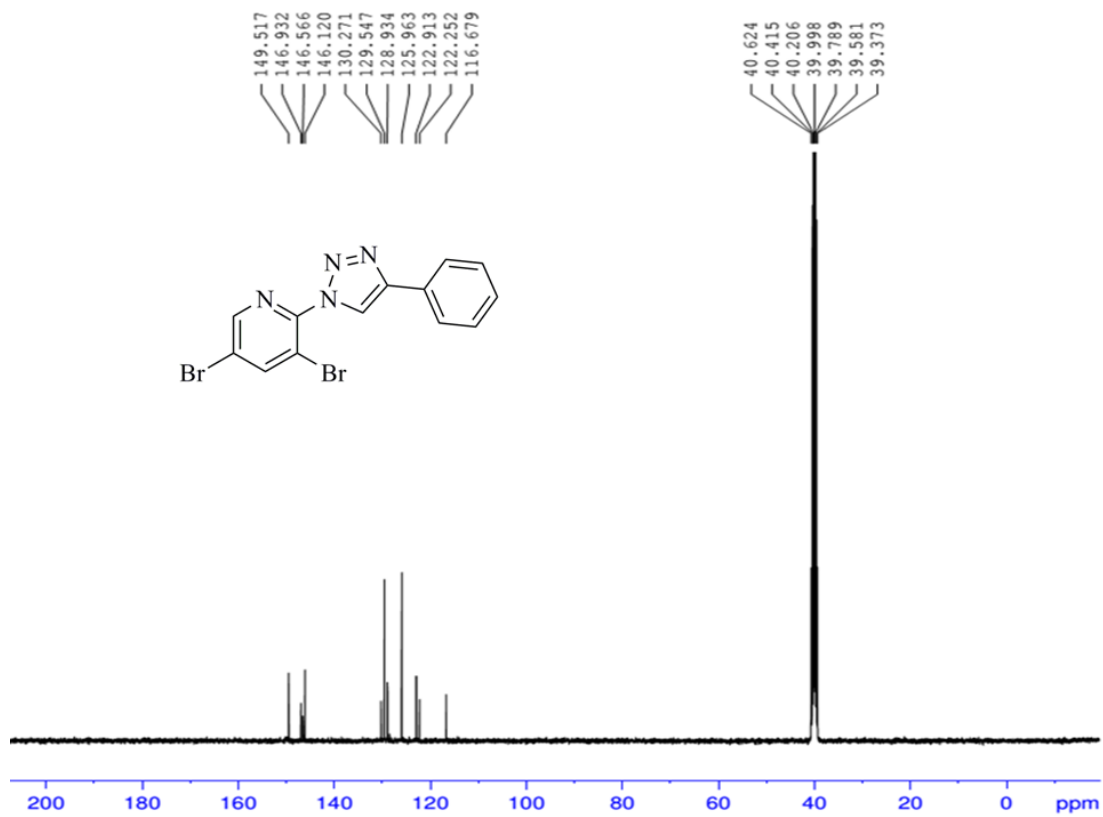

**Figure 27.** <sup>13</sup>C NMR spectrum of **4i**



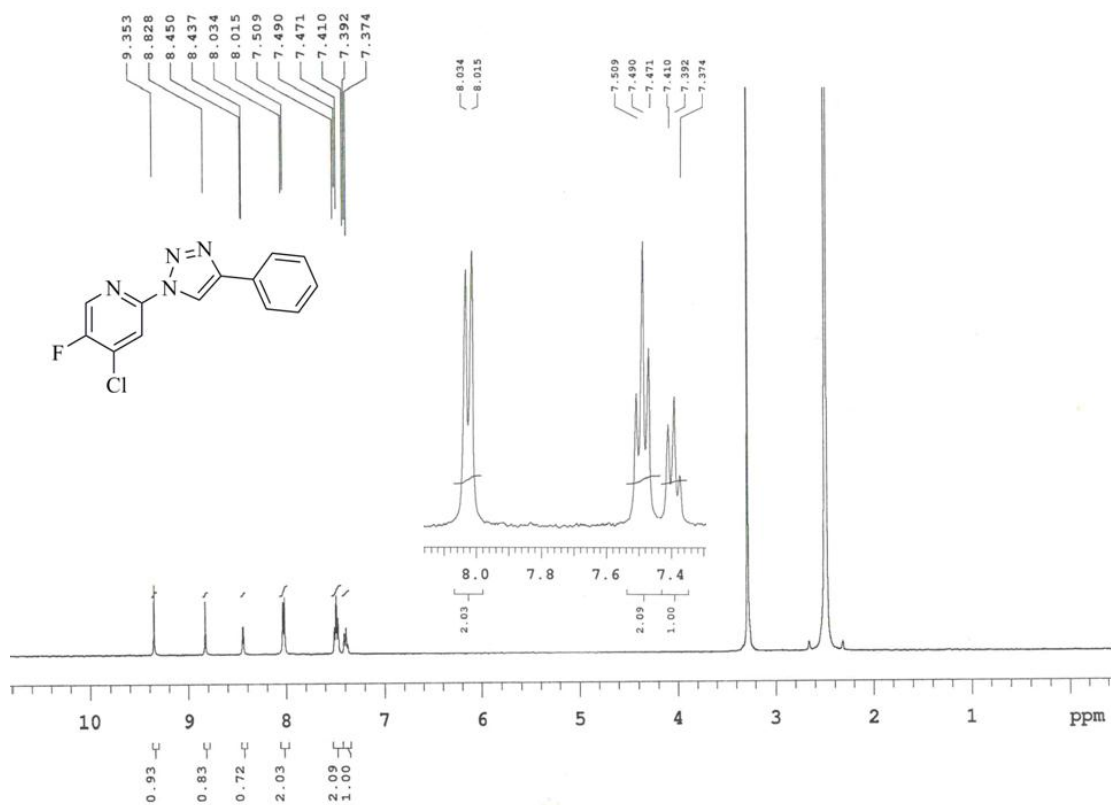

Figure 28. <sup>1</sup>H NMR spectrum of 4j

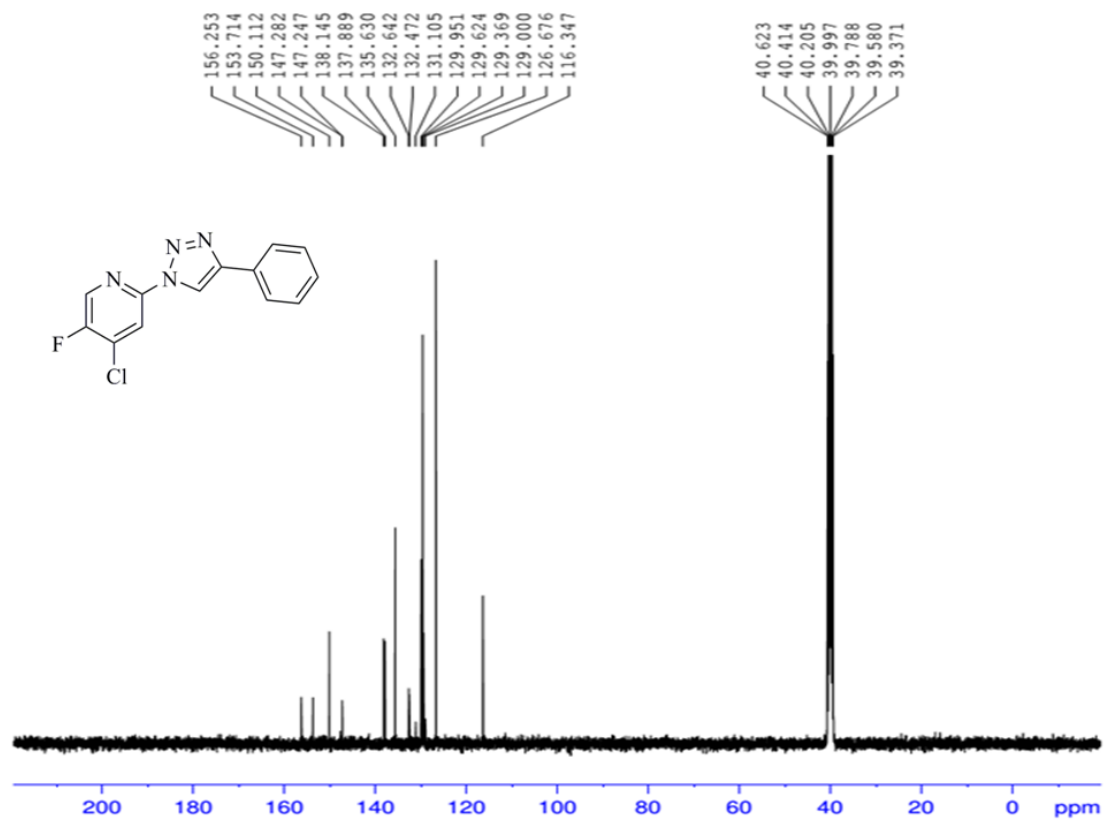

Figure 29. <sup>13</sup>C NMR spectrum of 4j

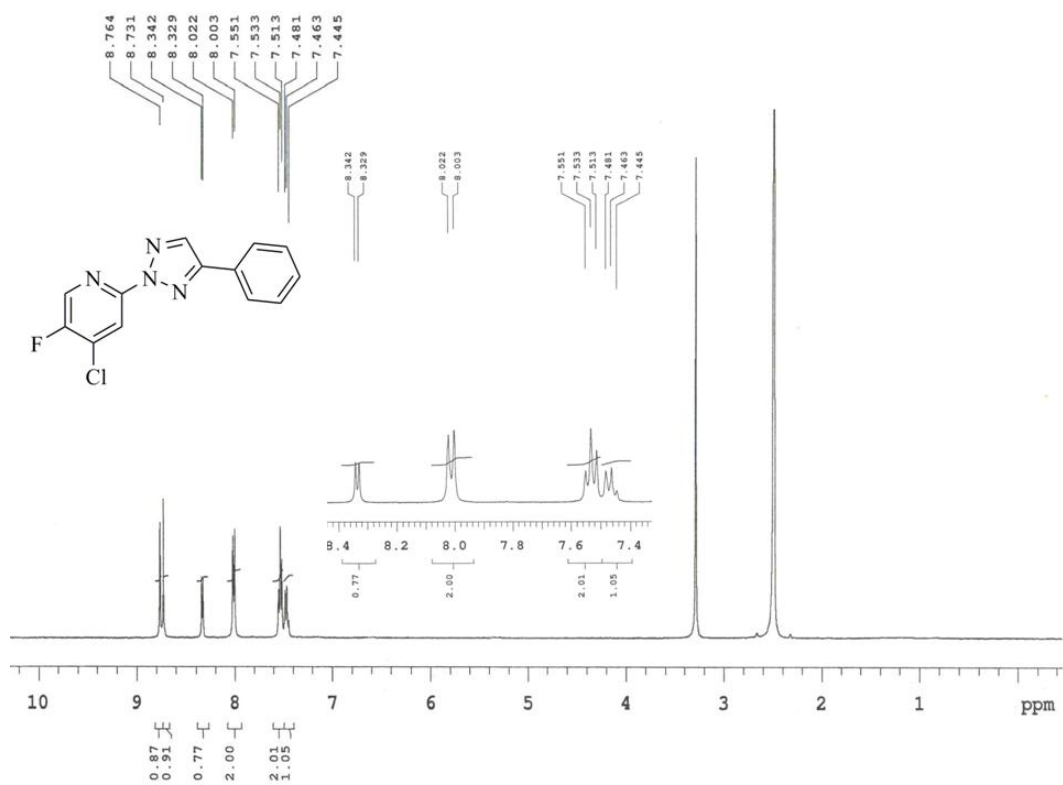

Figure 30. <sup>1</sup>H NMR spectrum of 4ja

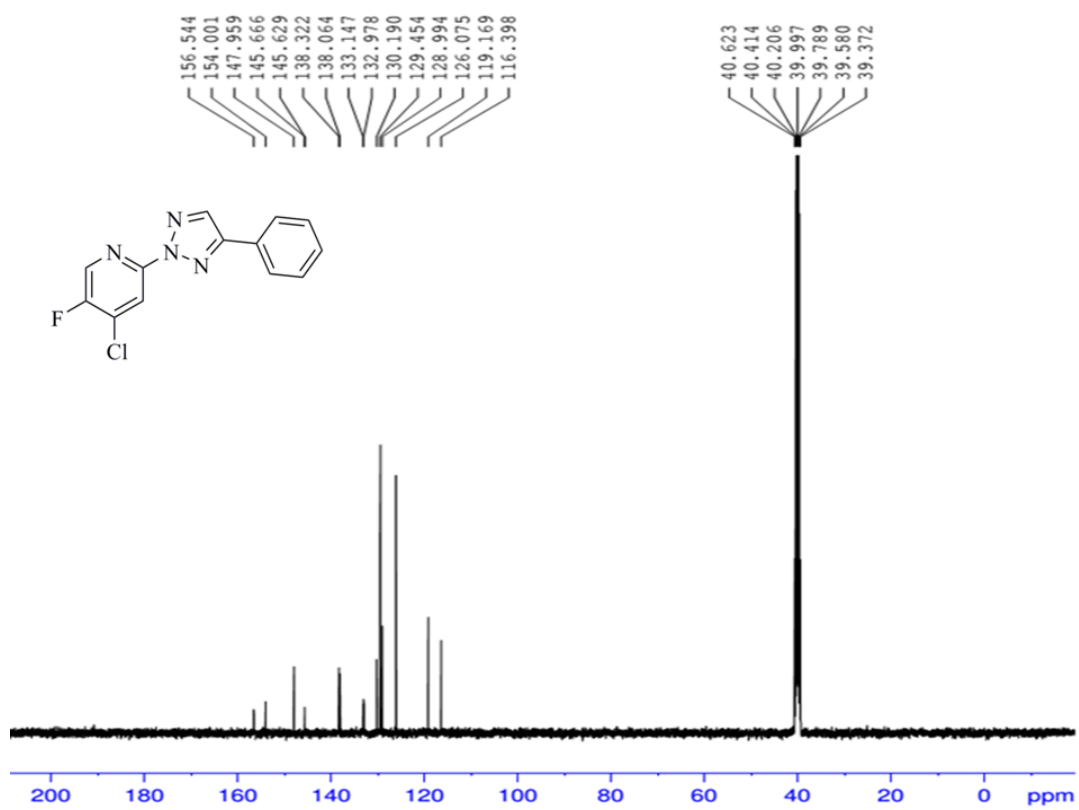

Figure 31. <sup>13</sup>C NMR spectrum of 4ja

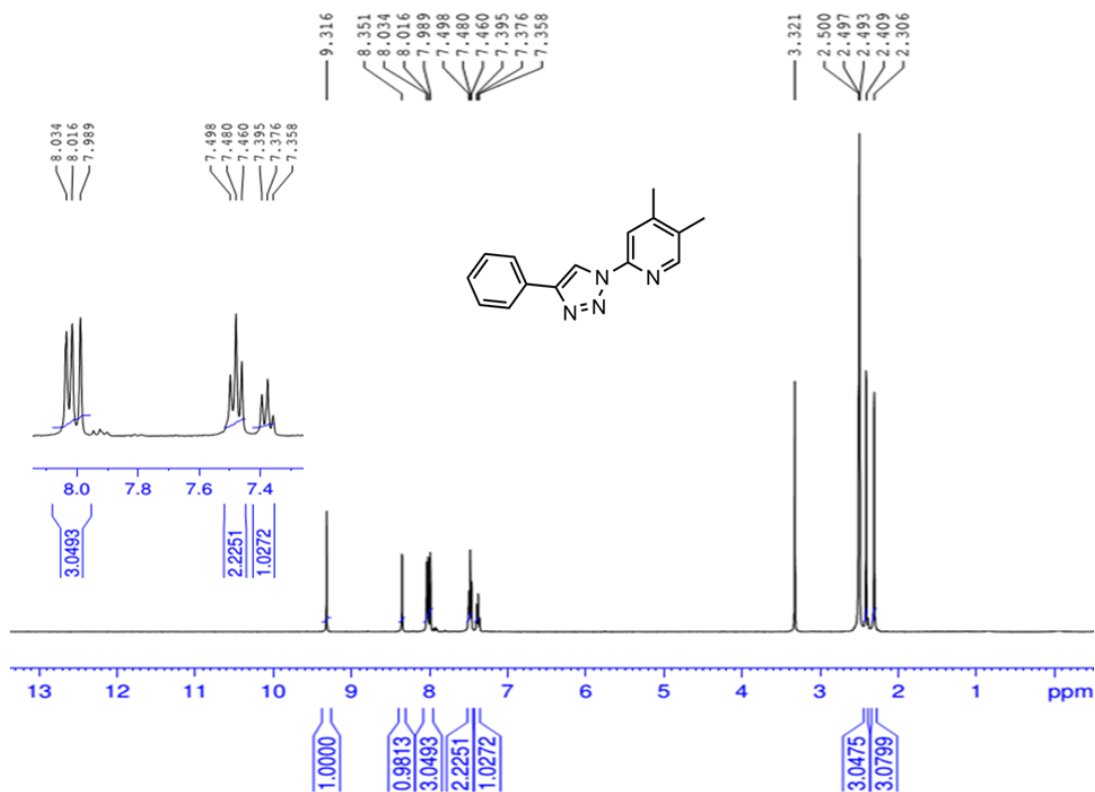

Figure 32. <sup>1</sup>H NMR spectrum of 4k

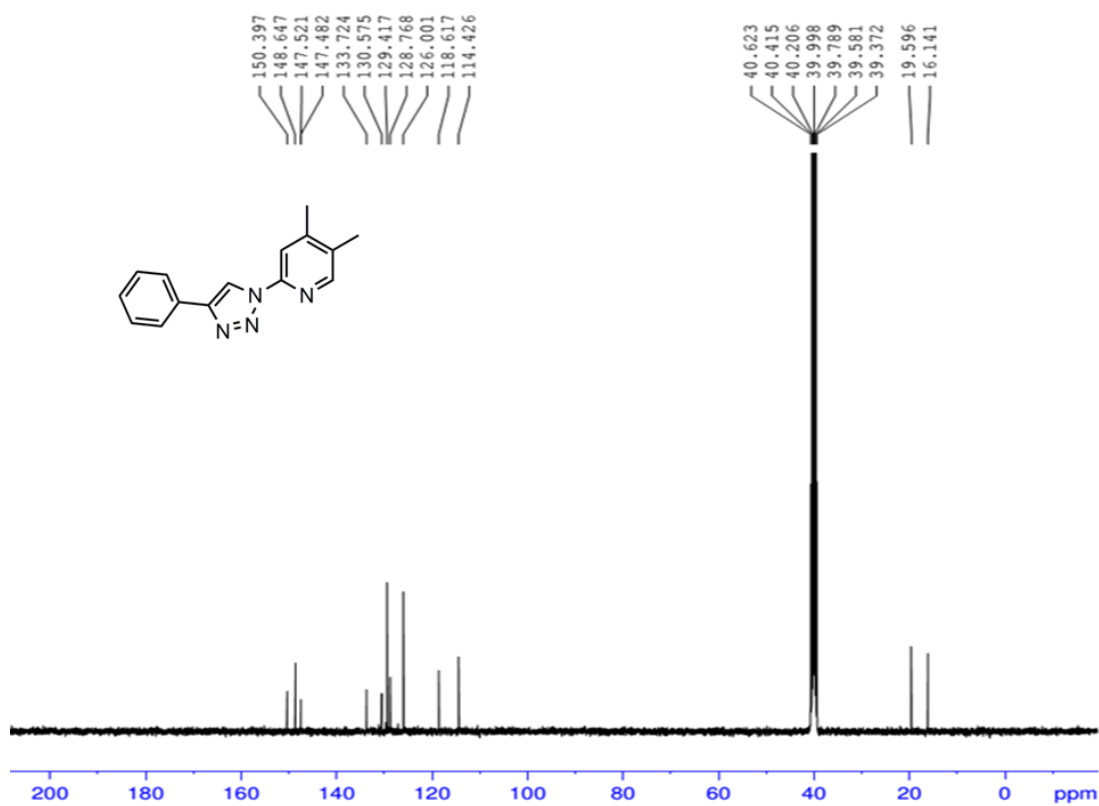

Figure 33. <sup>13</sup>C NMR spectrum of 4k

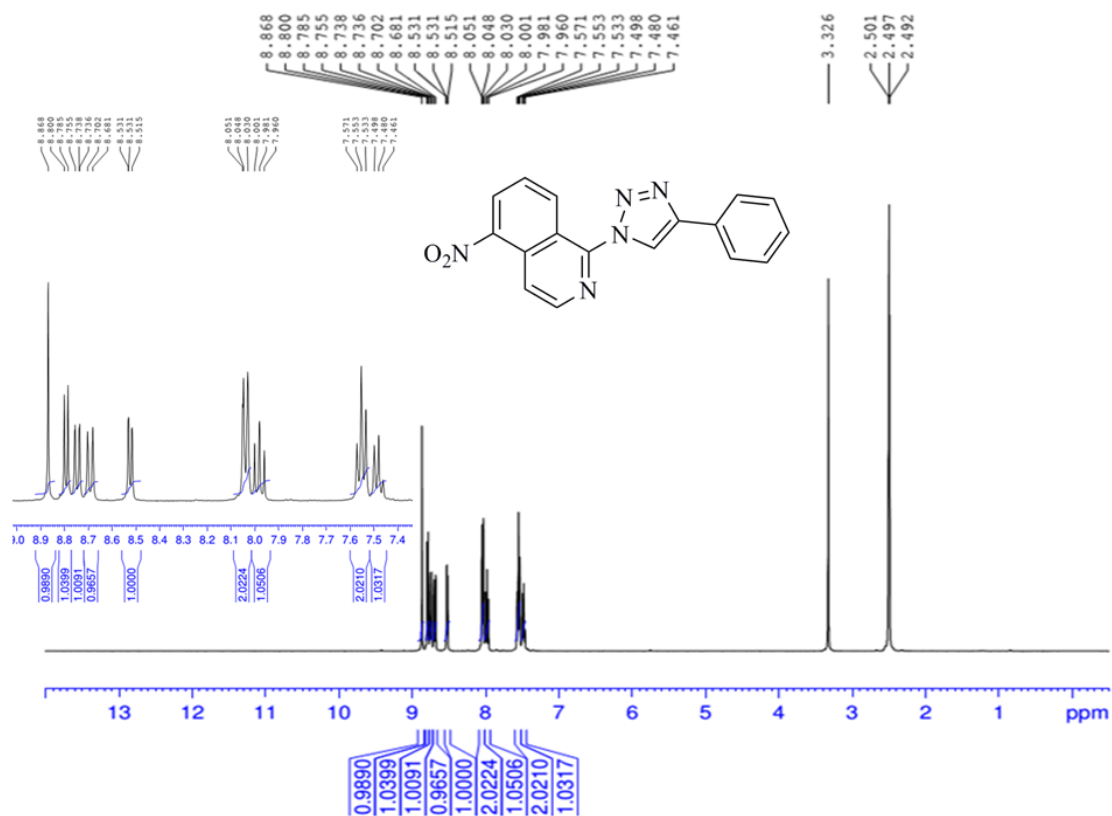

Figure 34. <sup>1</sup>H NMR spectrum of 4l

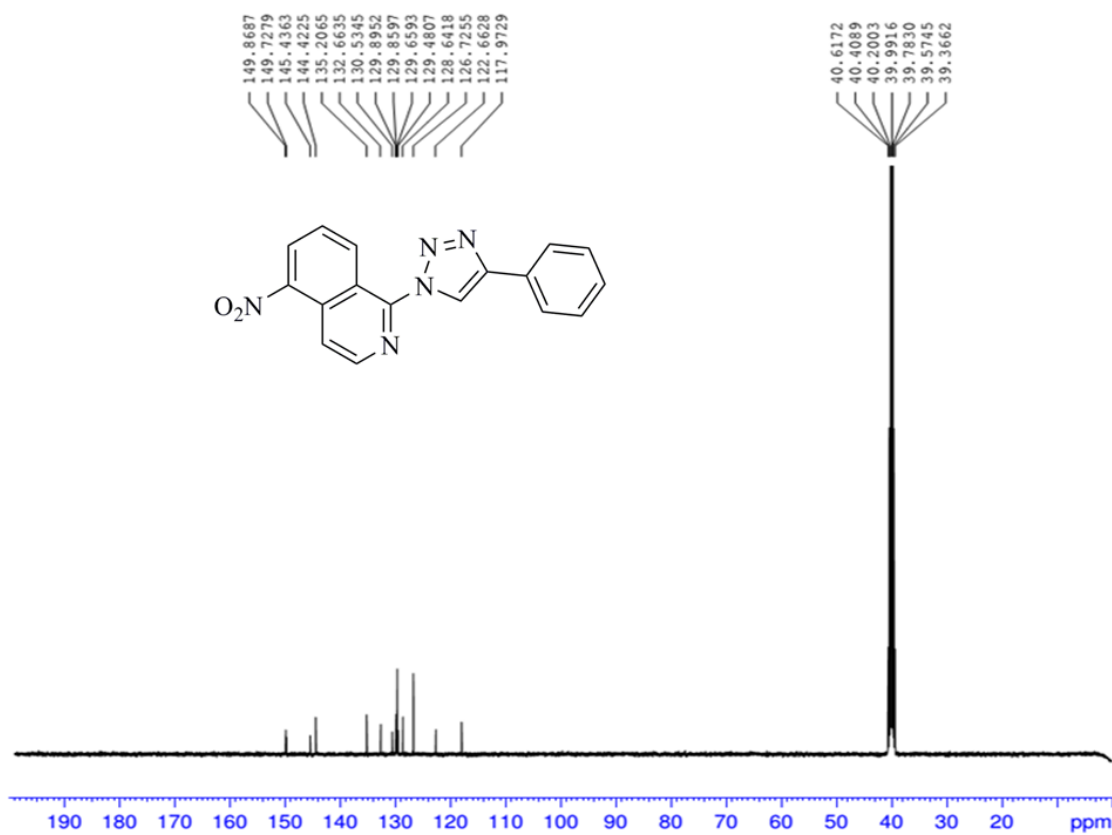

Figure 35. <sup>13</sup>C NMR spectrum of 4l

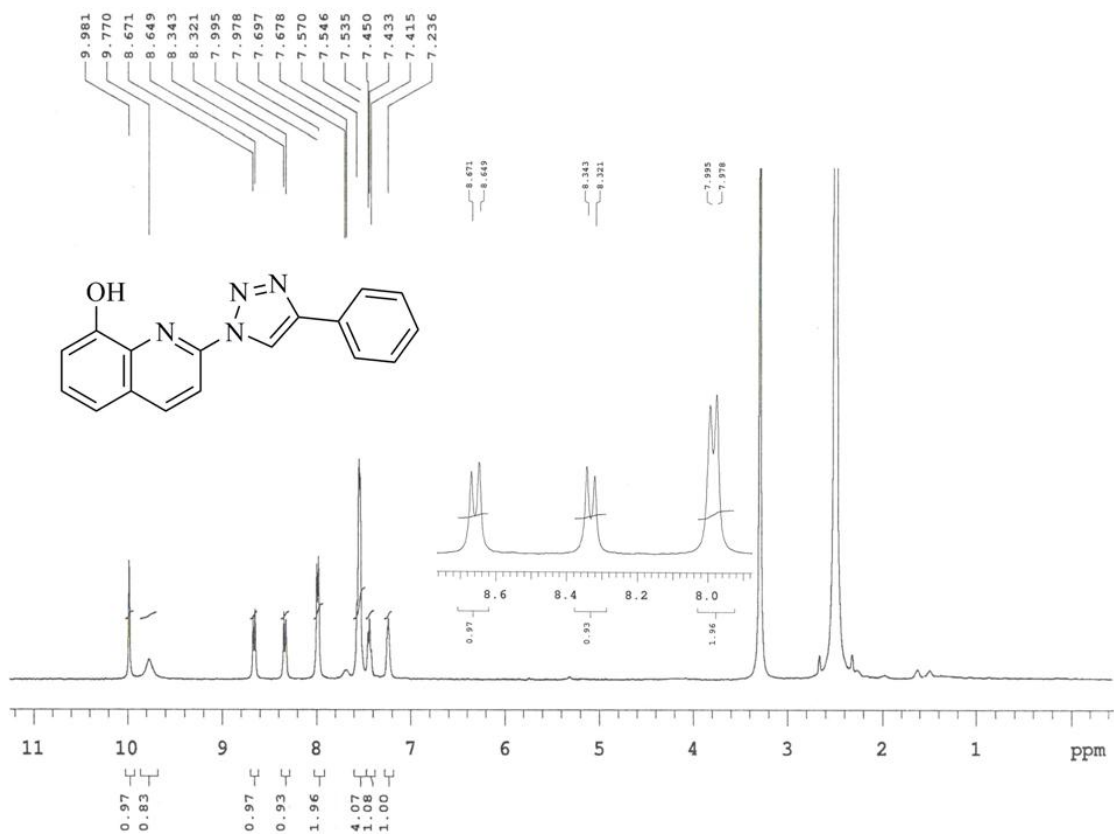

**Figure 36.** <sup>1</sup>H NMR spectrum of **4m**

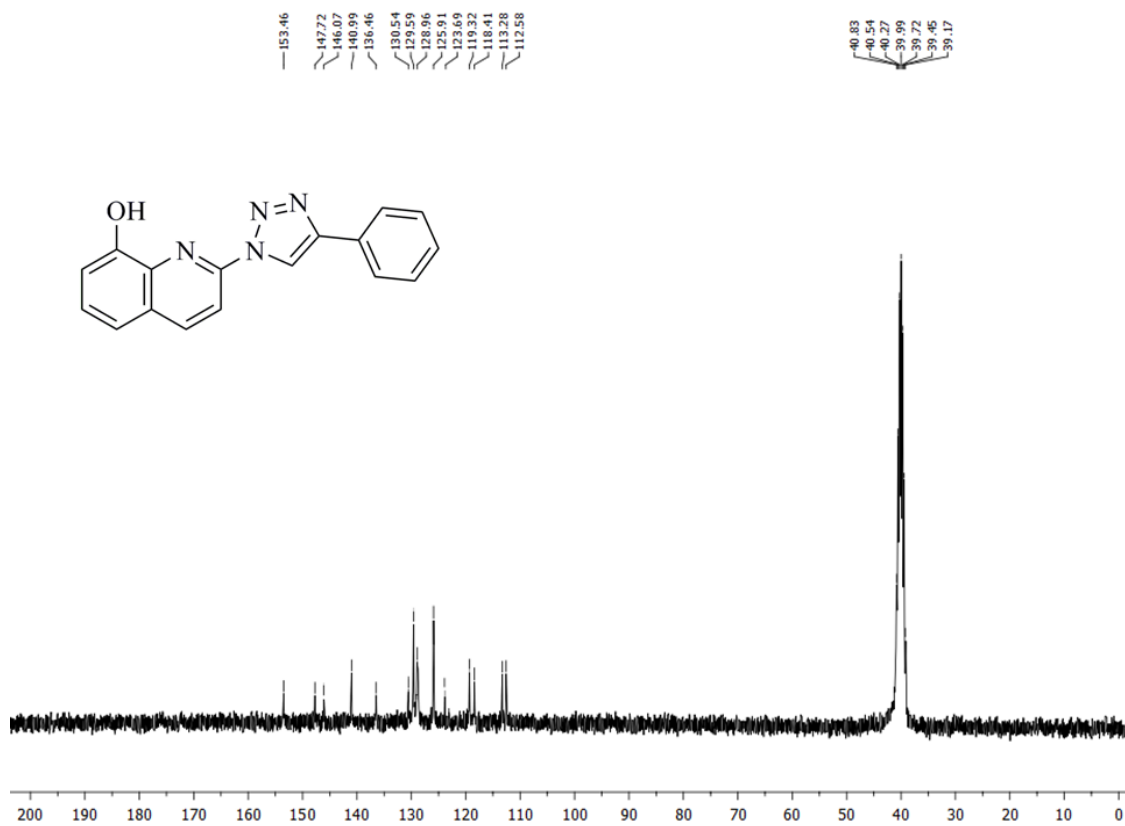

**Figure 37.** <sup>13</sup>C NMR spectrum of **4m**

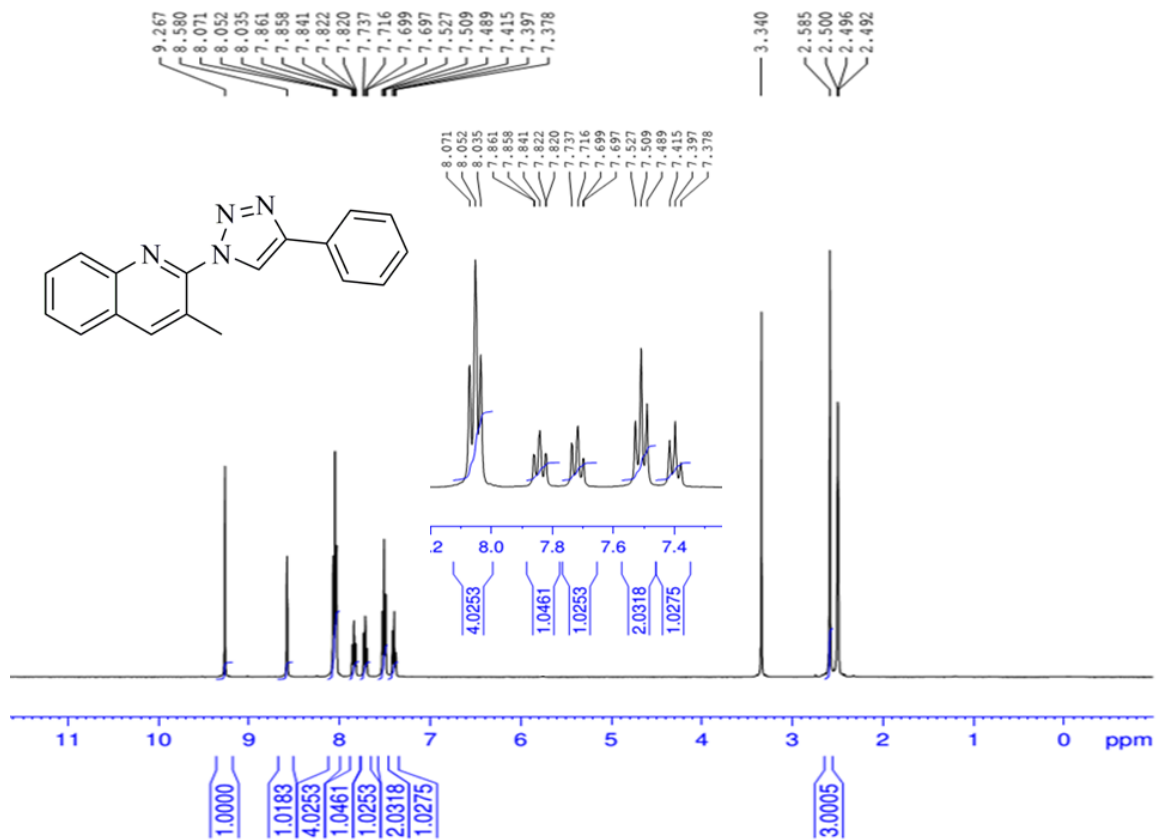

**Figure 38.**  $^1\text{H}$  NMR spectrum of **4n**

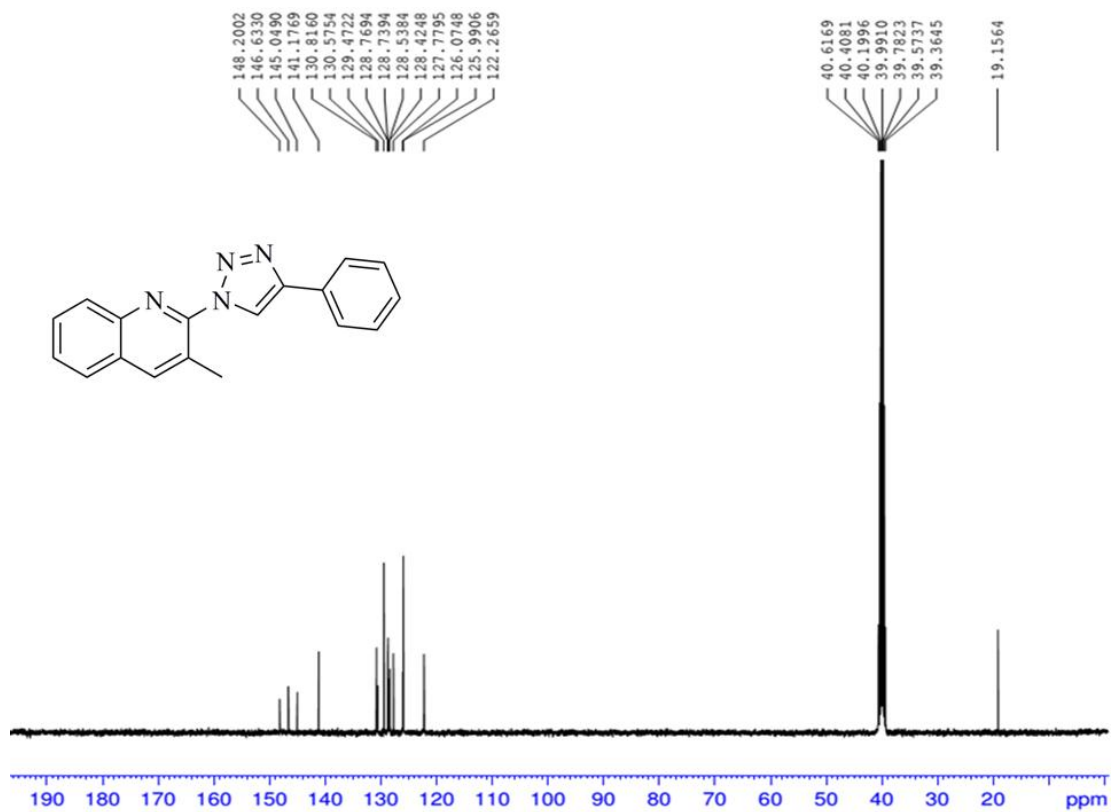

**Figure 39.**  $^{13}\text{C}$  NMR spectrum of **4n**

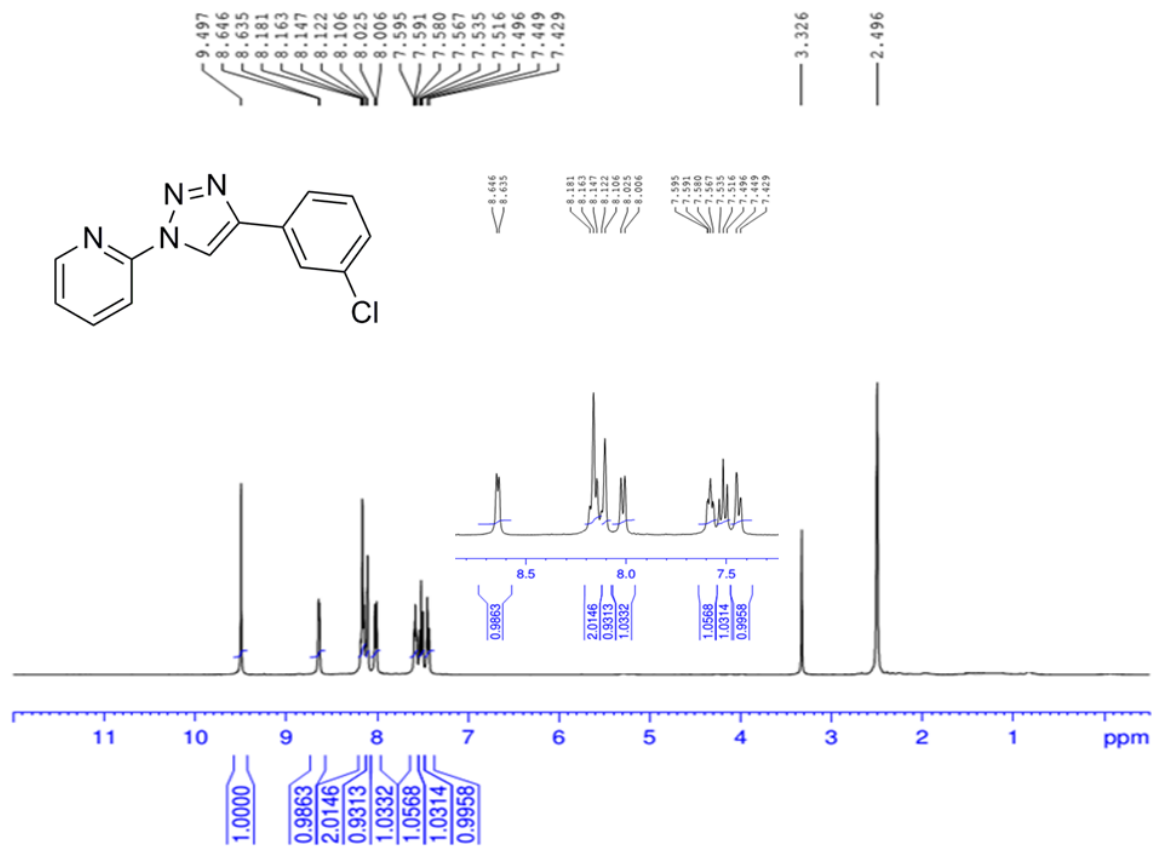

Figure 40. <sup>1</sup>H NMR spectrum of **4o**

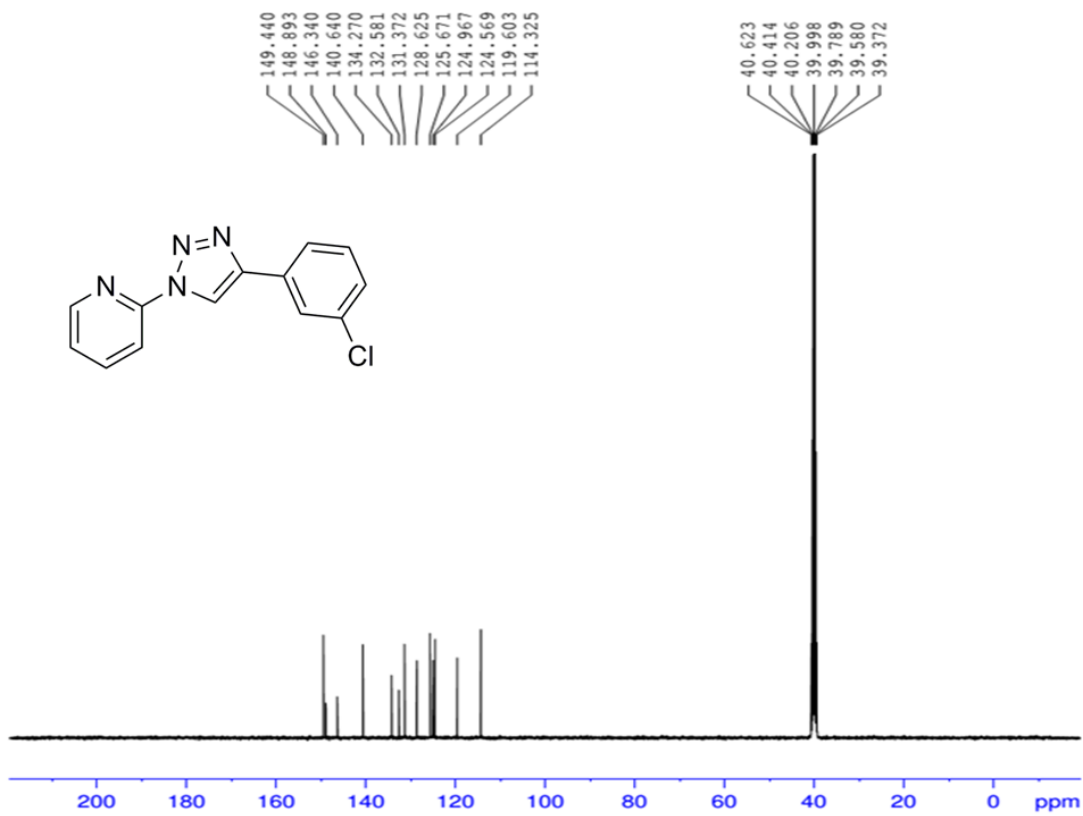

Figure 41. <sup>13</sup>C NMR spectrum of **4o**

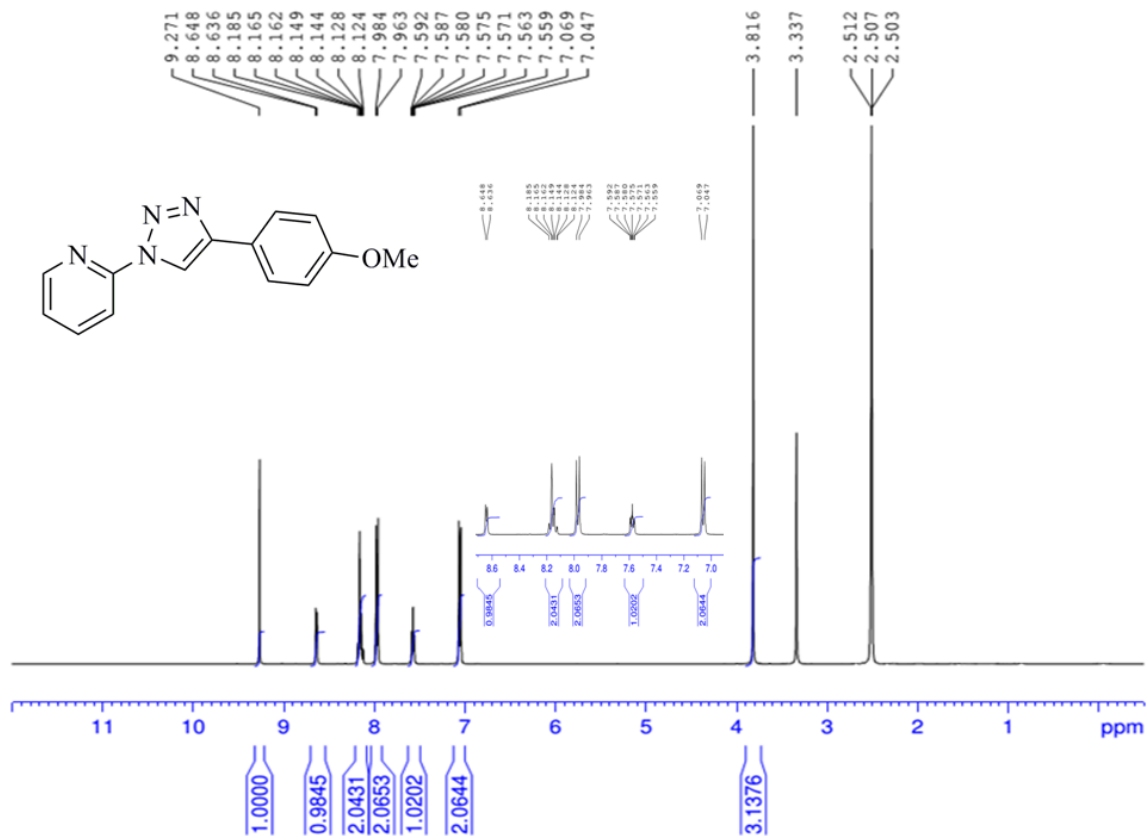

**Figure 42.** <sup>1</sup>H NMR spectrum of **4p**

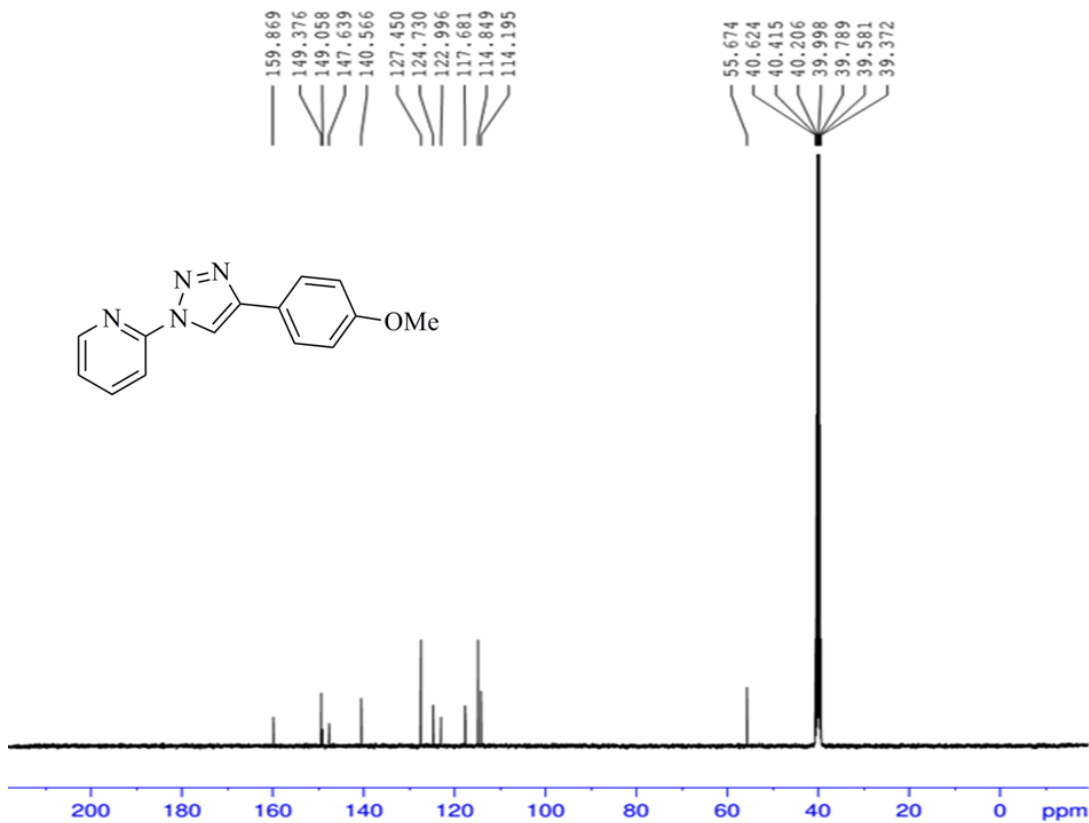

**Figure 43.** <sup>13</sup>C NMR spectrum of **4p**



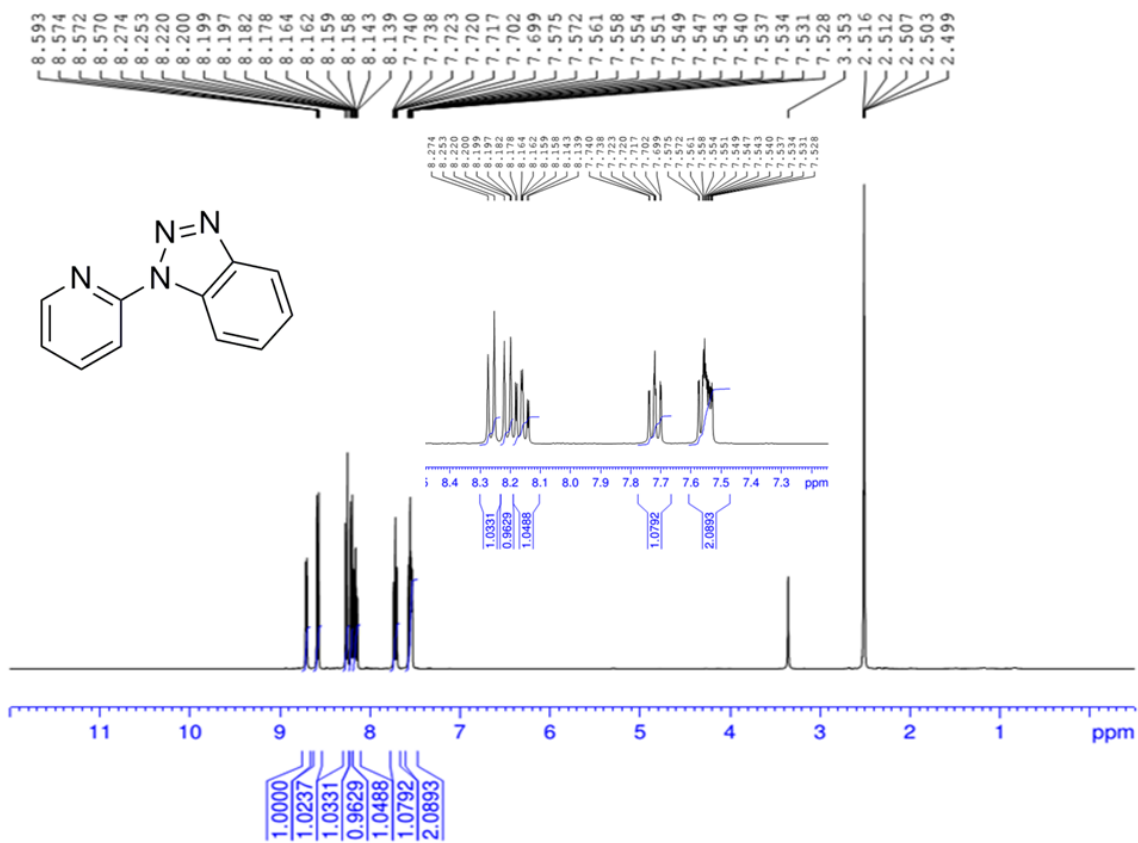

**Figure 44.** <sup>1</sup>H NMR spectrum of **4q**

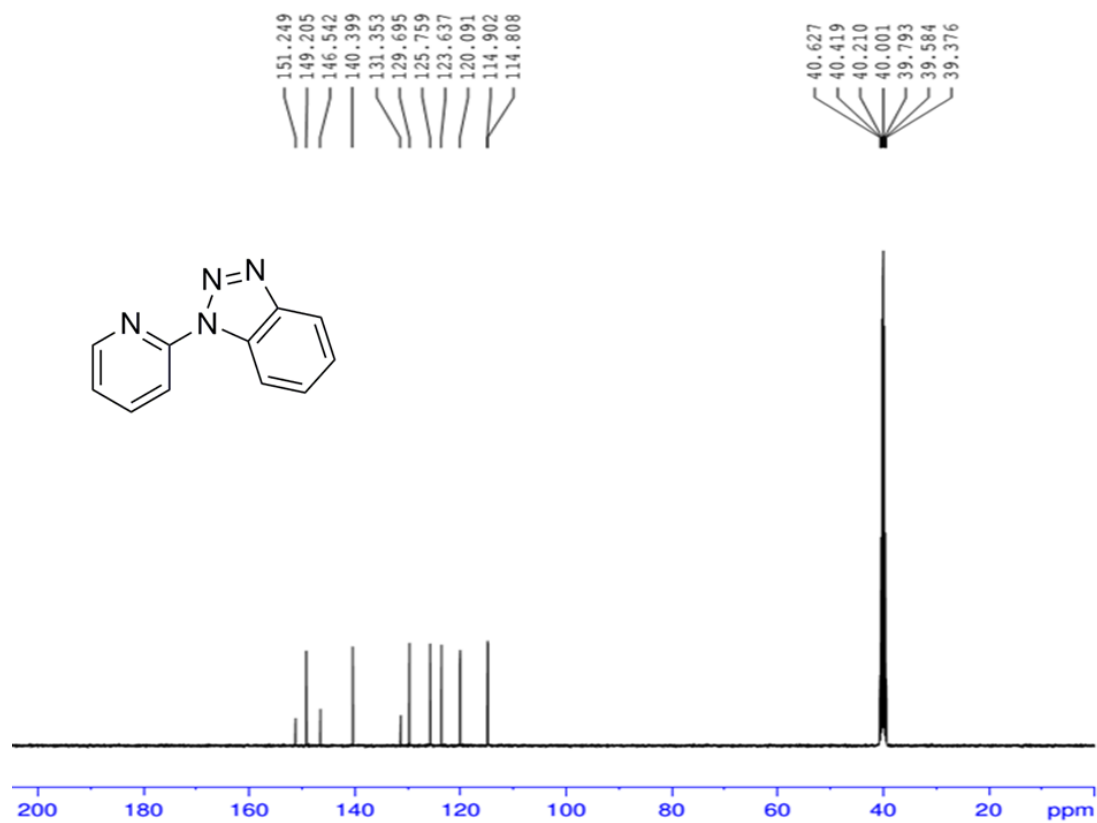

**Figure 45.** <sup>13</sup>C NMR spectrum of **4q**

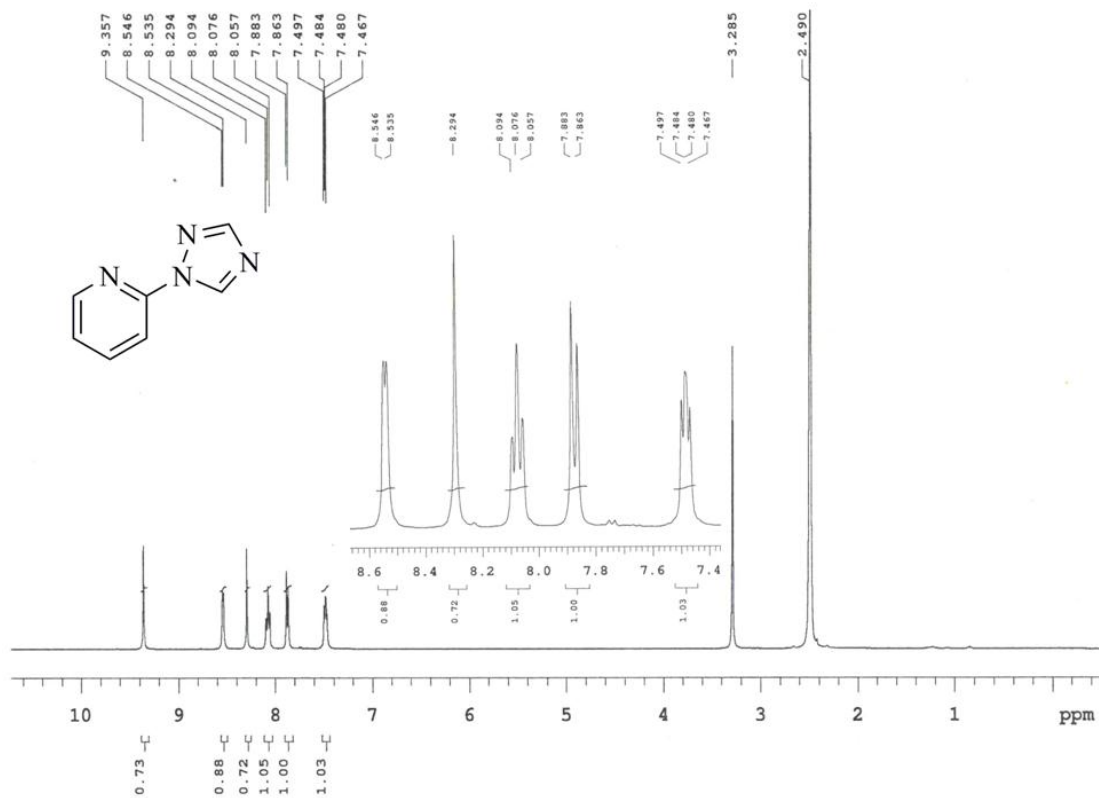

Figure 46. <sup>1</sup>H NMR spectrum of 4r

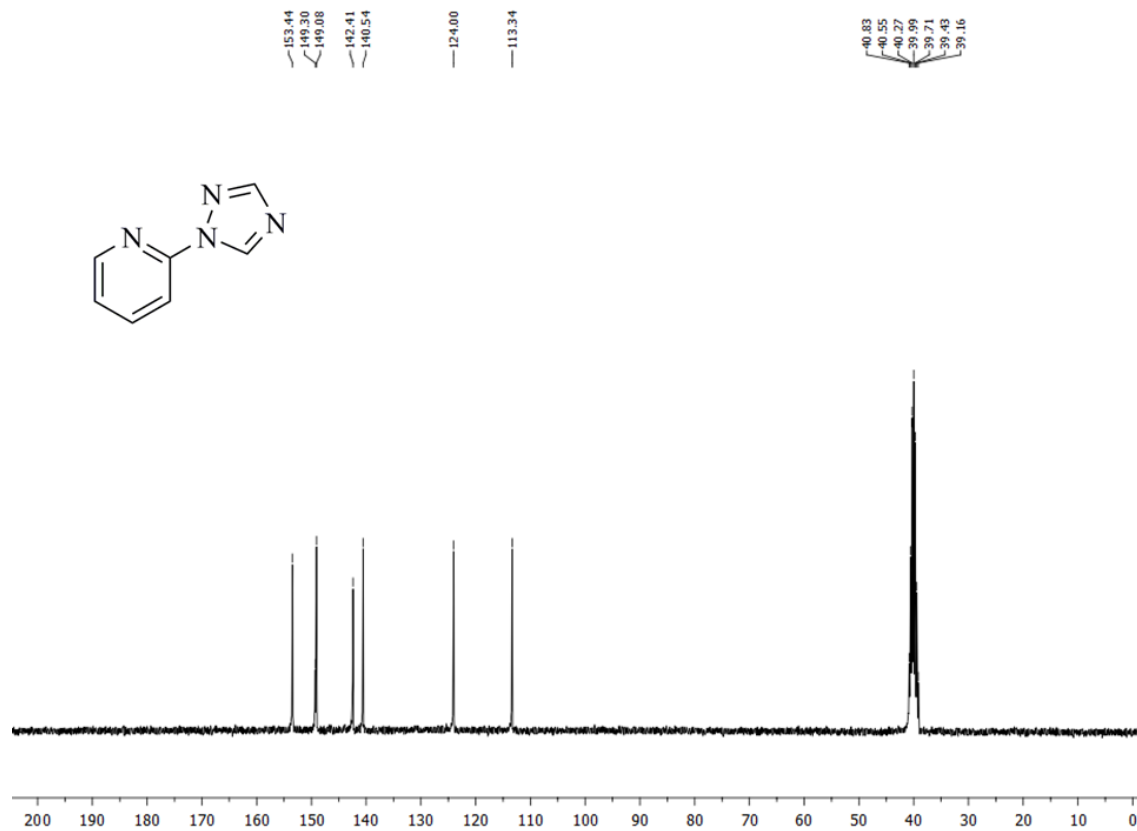

Figure 47. <sup>13</sup>C NMR spectrum of 4r
